# Supplementary material
Source: Research Square preprint supplement (doi:10.21203/rs.3.rs-8830089/v1)
Supplement: Supplementary file 1 [file d3cfbce5bb36899345cdae49.docx]

### Supporting Information

for

**Termodynamic stability and anticancer activity of 2,3-unsaturated**

**and 2,3-dideoxy *O*3-betulin glycosides**

Grzegorz Detlaff1, Aleksandra Hać2, Daria Grzywacz1, Paulina Czaplewska3, Beata Liberek1*

1Faculty of Chemistry, University of Gdańsk, Wita Stwosza 63, 80-308 Gdańsk, Poland

2Faculty of Biology, University of Gdańsk, Wita Stwosza 59, 80-308 Gdańsk, Poland

3Intercollegiate Faculty of Biotechnology, University of Gdansk, Abrahama 58, 80-307 Gdańsk, Poland

Email: Beata Liberek* - beata.liberek@ug.edu.pl

* Corresponding author

**Contents:**

| **Figure S1** | The viability of HaCaT (**A**), MCF7 (**B**) and PC3 (**C**) cells after 48 h treatment with **7α-18β**. | S2-S4 |
| --- | --- | --- |
| **Table S1** | The morphology of MCF-7 cells after 24 h and 48 h of exposure to  betulin (**BtOH**) and *O*3-betulin glycosides (**7α**-**18β**) at concentration of 25 µM and 50 µM. | S5-S6 |
| **Table S2** | A list of observed morphological changes in MCF7 cancer cells after 24 h and 48 h of exposure to betulin (**BtOH**) and *O*3-betulin  glycosides (**7α**-**18β**) at concentration of 25 µM and 50 µM. | S7 |
| **Figure S2** | 1H and 13C NMR spectra of **7α** | S8 |
| **Figure S3** | 1H and 13C NMR spectra of **8α** | S9 |
| **Figure S4** | 1H and 13C NMR spectra of **9α** | S10 |
| **Figure S5** | 1H and 13C NMR spectra of **10α** | S11 |
| **Figure S6** | 1H and 13C NMR spectra of **11α** | S12 |
| **Figure S7** | 1H and 13C NMR spectra of **11β** | S13 |
| **Figure S8** | 1H and 13C NMR spectra of **12β** | S14 |
| **Figure S9** | 1H and 13C NMR spectra of **13α** | S15 |
| **Figure S10** | 1H and 13C NMR spectra of **14α** | S16 |
| **Figure S11** | 1H and 13C NMR spectra of **15α** | S17 |
| **Figure S12** | 1H and 13C NMR spectra of **16α** | S18 |
| **Figure S13** | 1H and 13C NMR spectra of **17β** | S19 |
| **Figure S14** | 1H and 13C NMR spectra of **18β** | S20 |


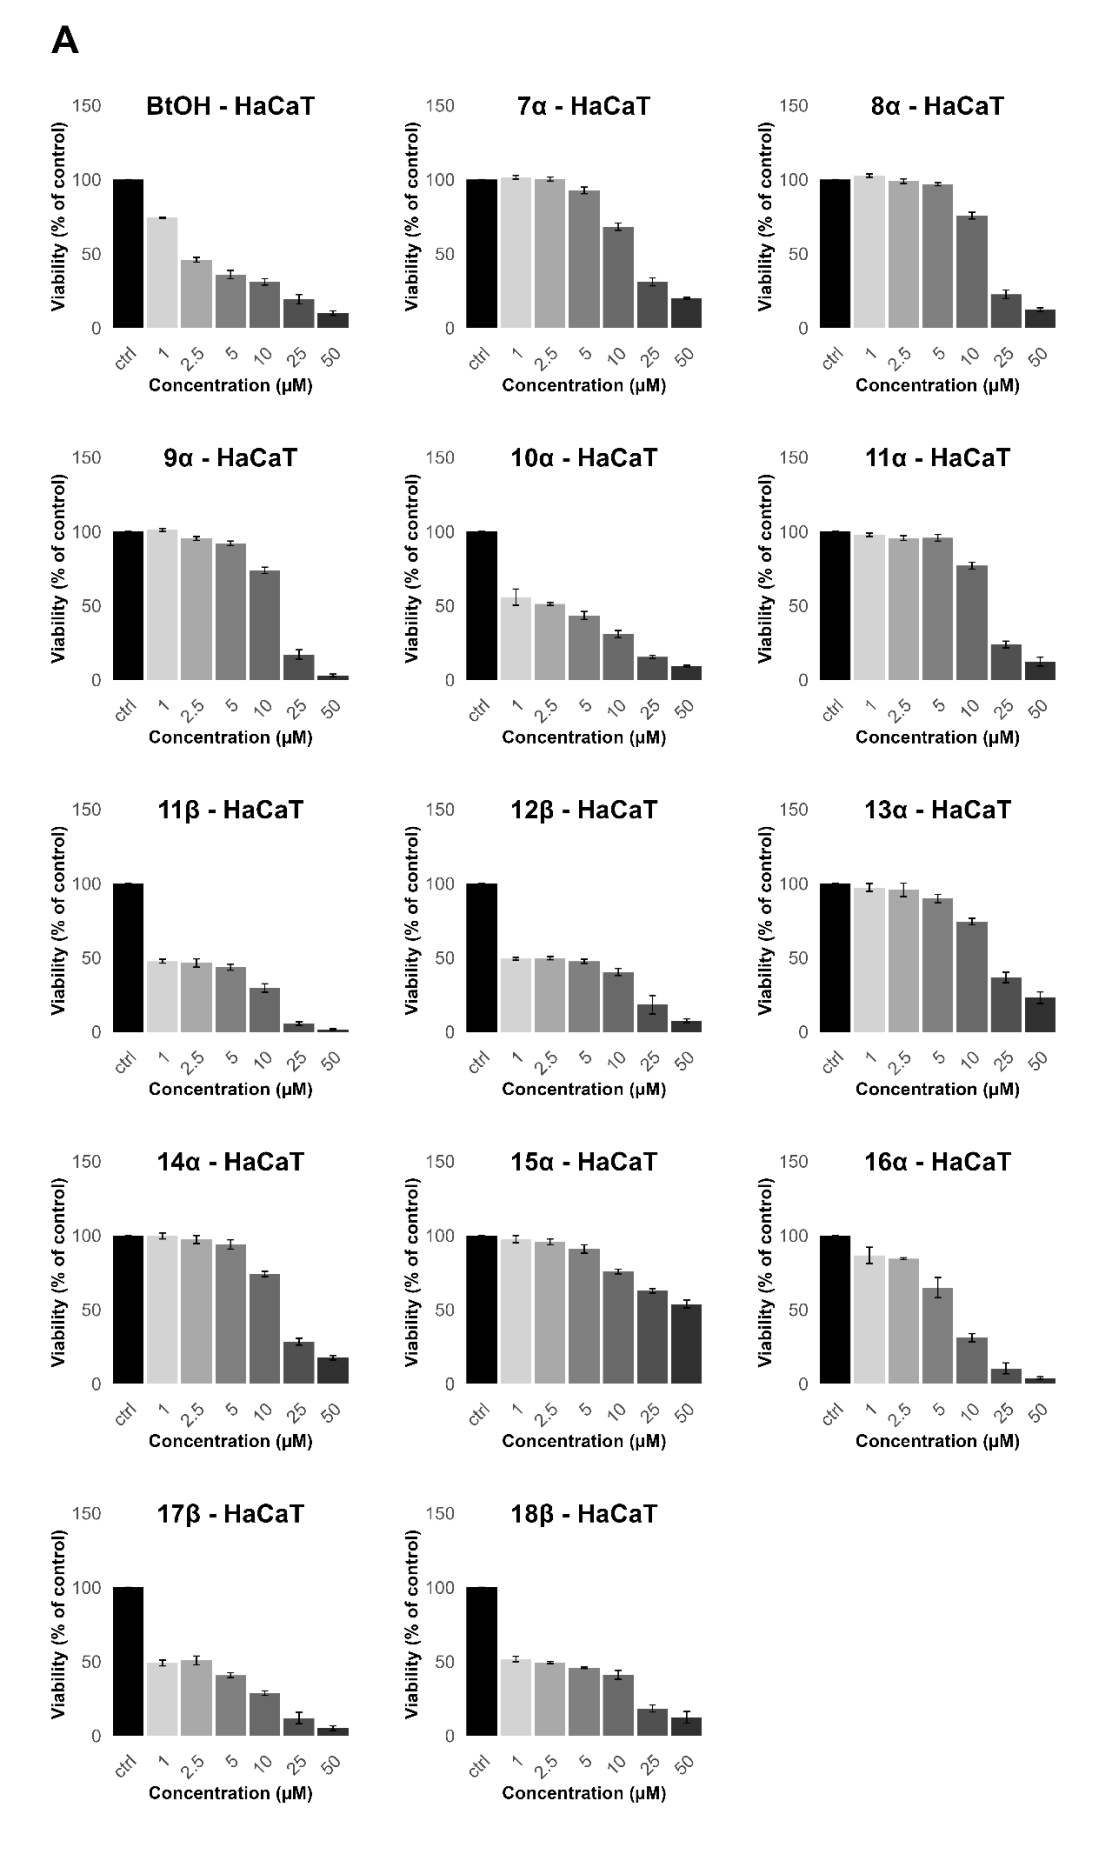

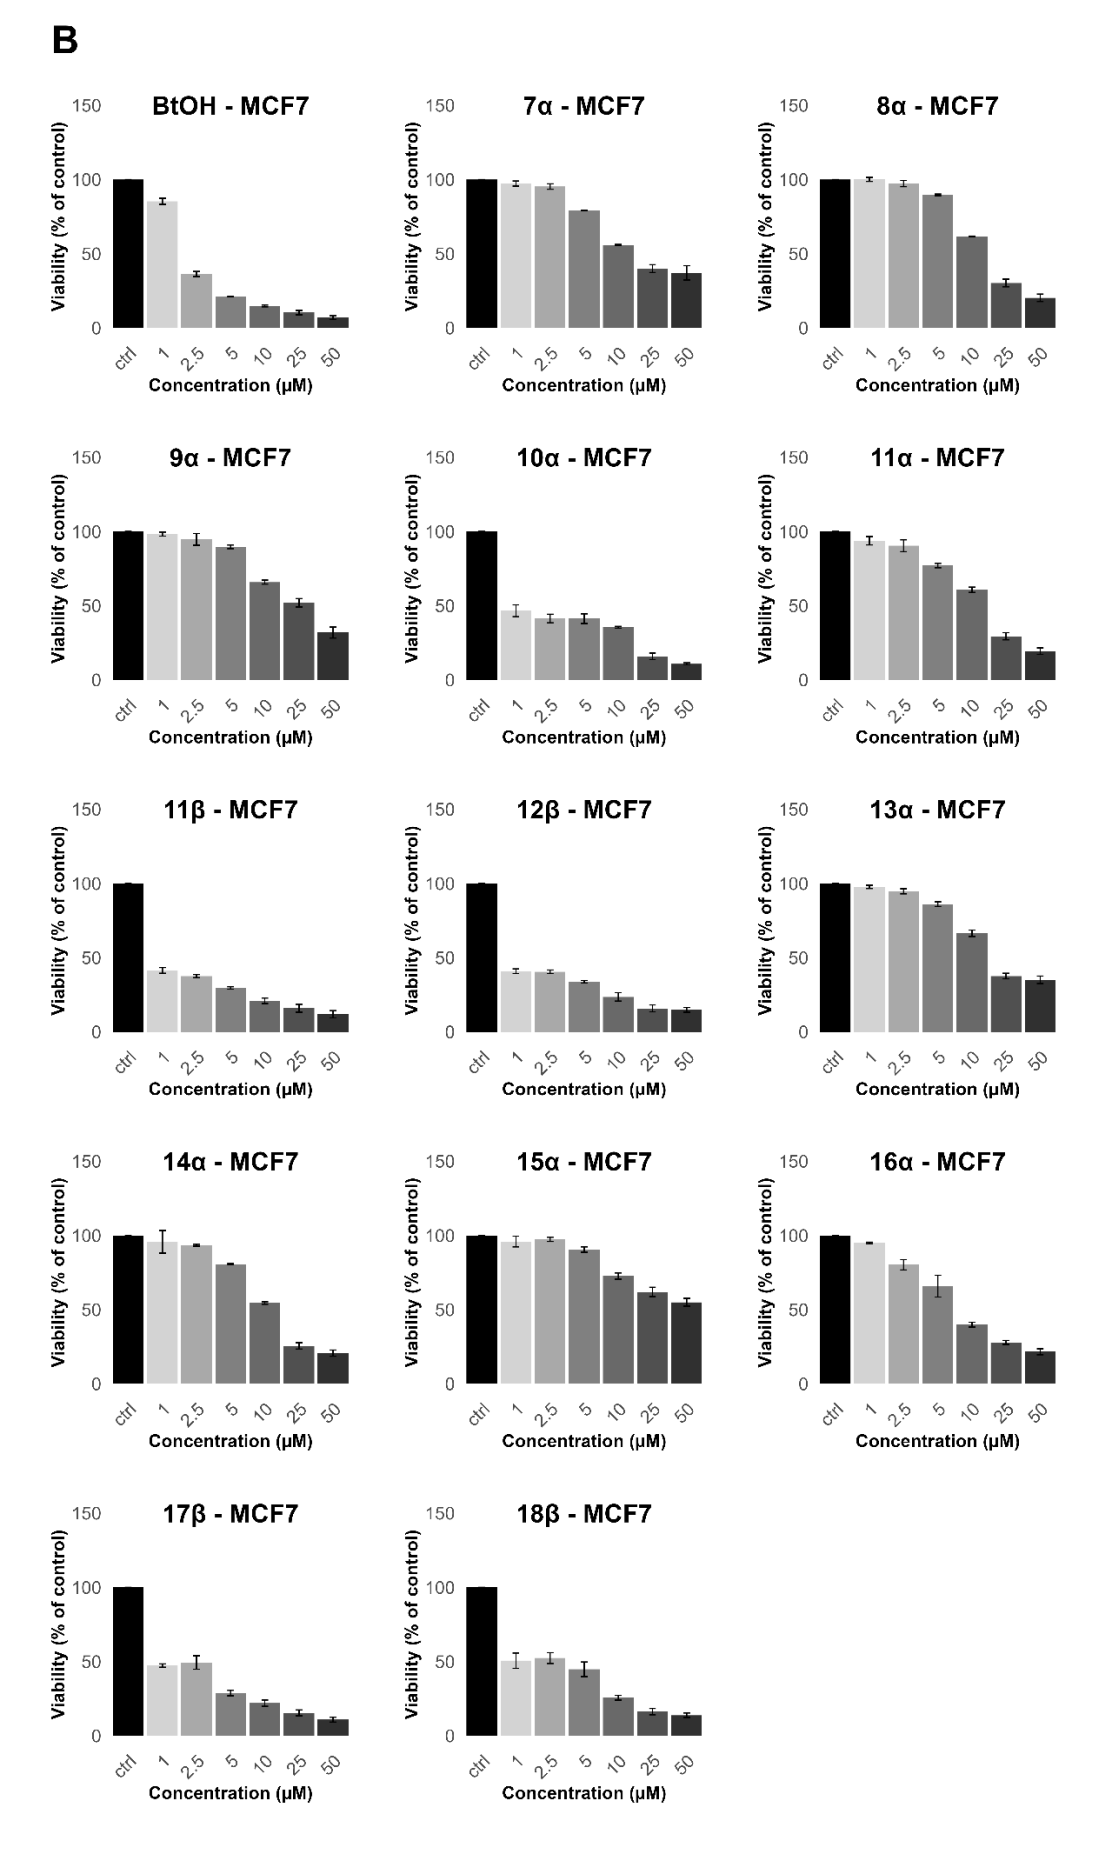

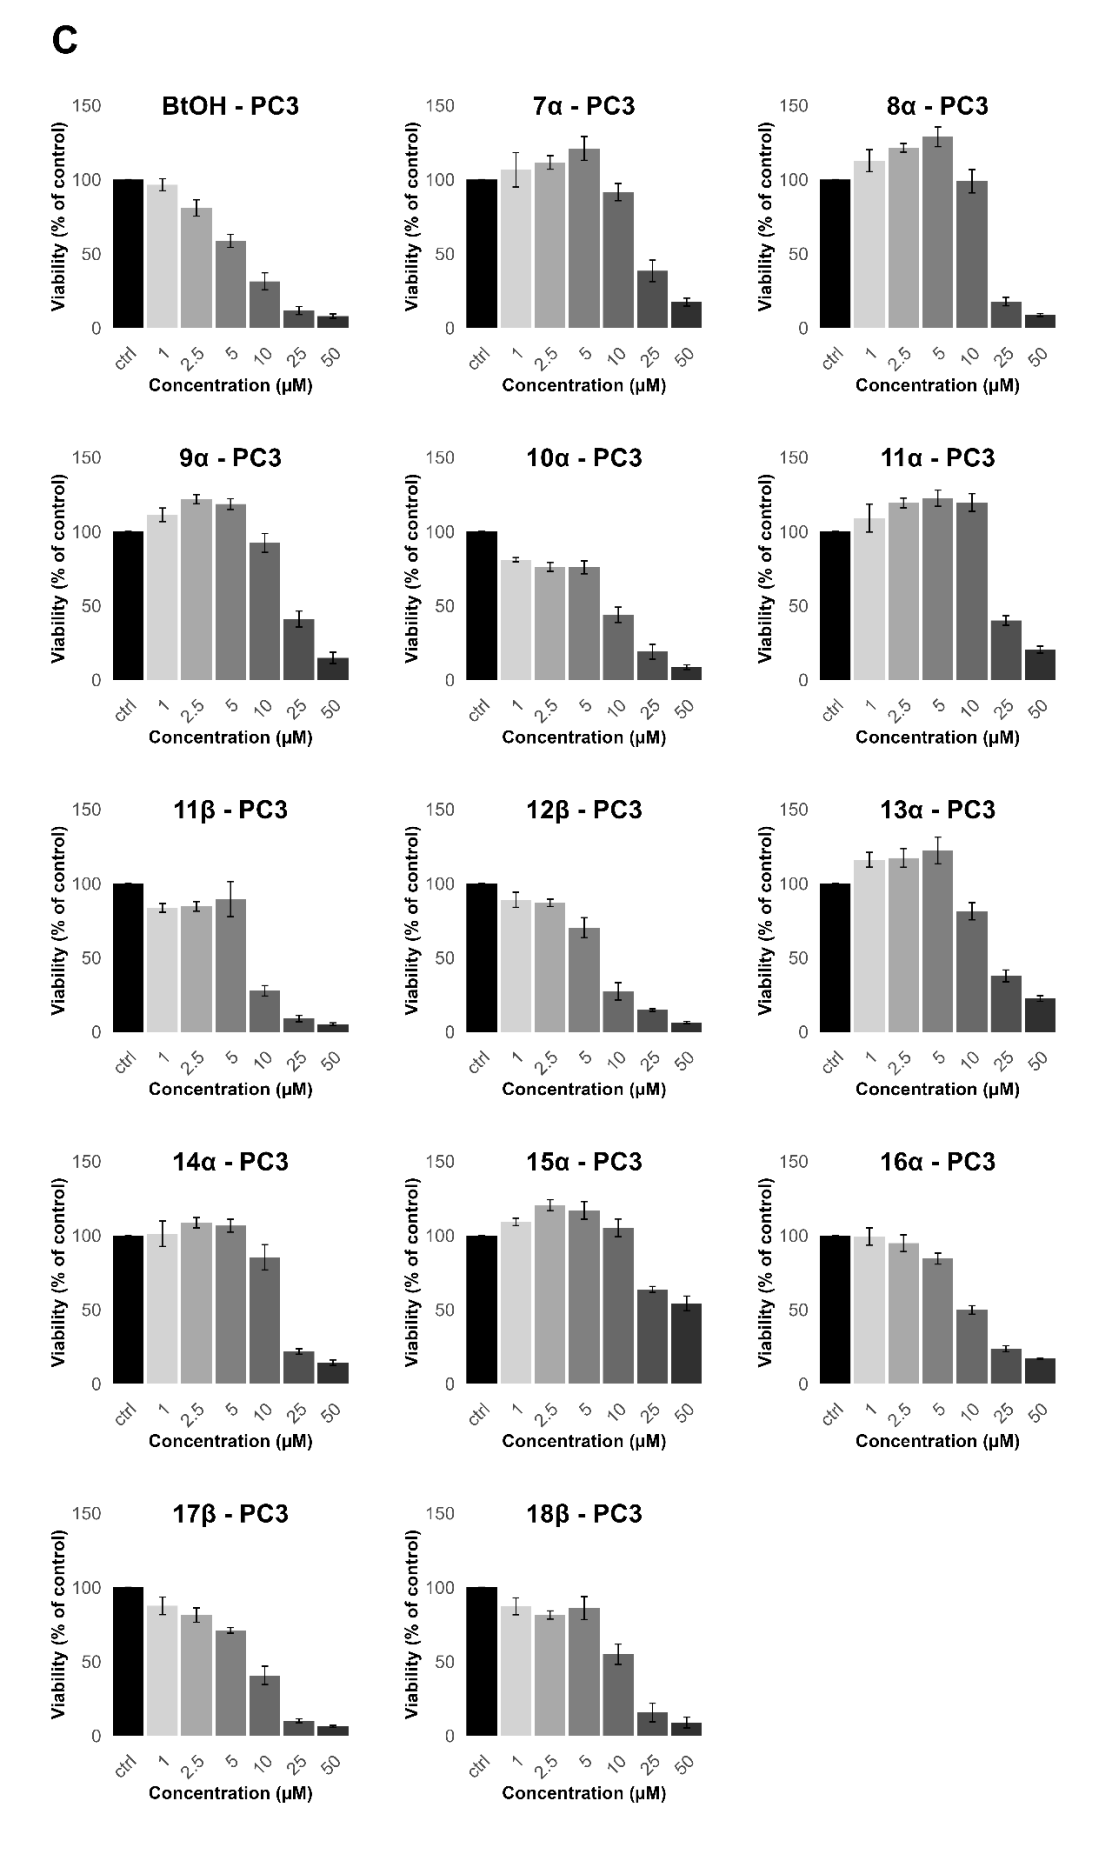


**Figure S1**. The viability of HaCaT (A), MCF7 (B) and PC3 (C) cells after 48 h treatment with **7α-18β**. The results are shown as the mean ± standard deviation (SD) of three independent experiments performed in at least triplicate. A statistically significant difference is present between treated cultures compared with control (culture treated with vehicle), *p* < 0.05.

**Table S1.** The morphology of MCF-7 cells after 24 h and 48 h of exposure to betulin (**BtOH**) and *O*3-betulin glycosides (**7α**-**18β**) at concentration of 25 µM and 50 µM.

| **Conc.** | **25 µM** | | **50 µM** | |
| --- | --- | --- | --- | --- |
| **Time** | **24 h** | **48 h** | **24 h** | **48 h** |
| **Ctrl*** | **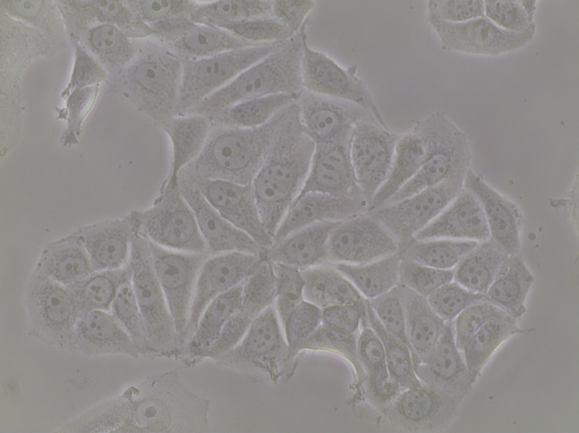** | **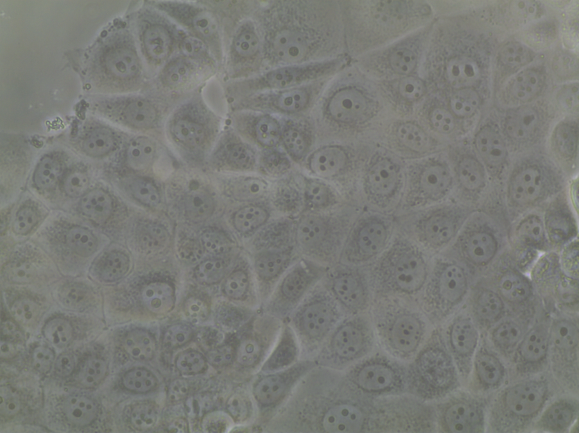** | **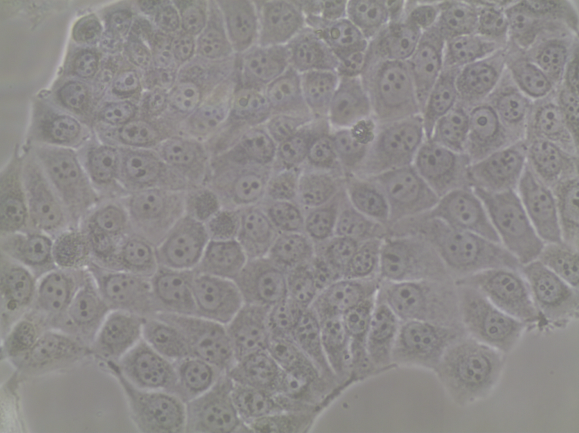** | **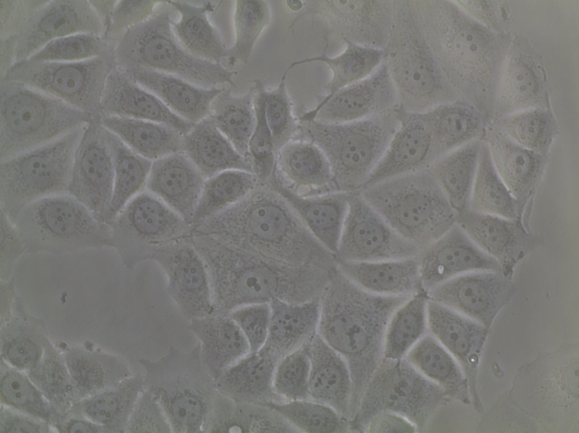** |
| **BtOH** | **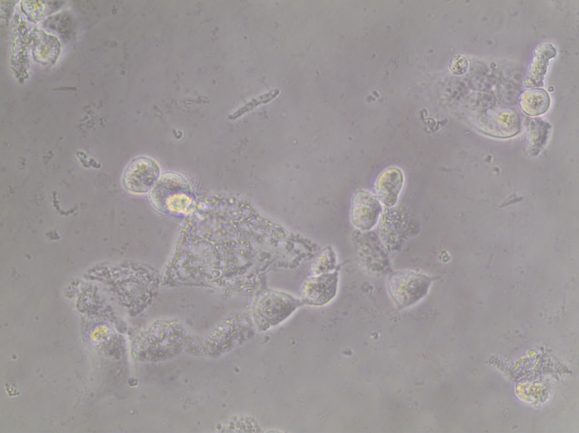** | **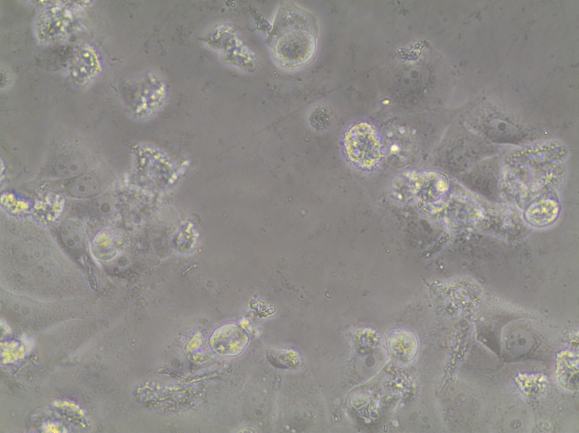** | **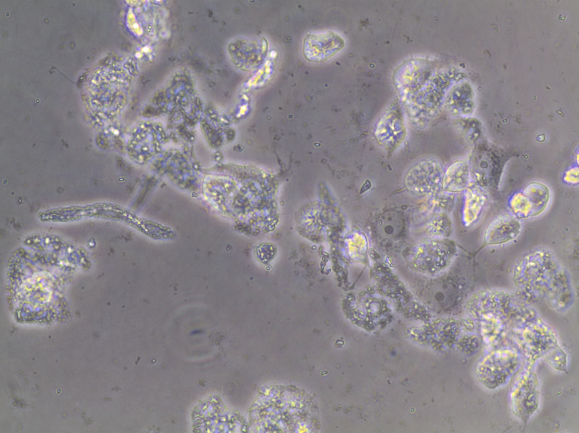** | **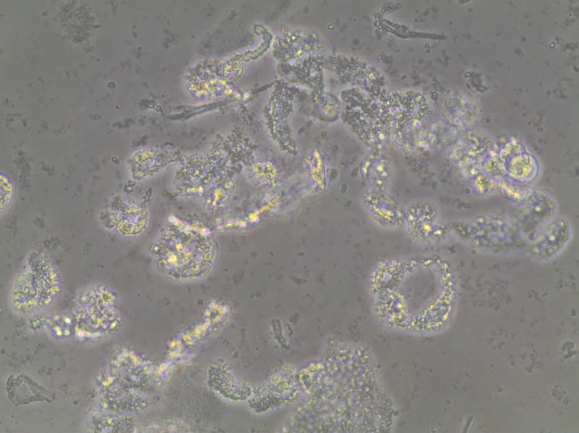** |
| **7α** | **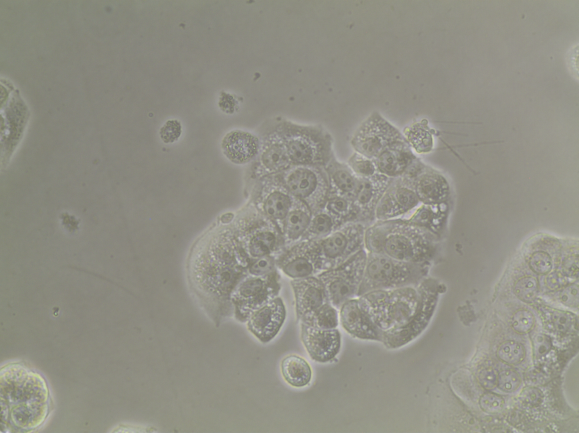** | **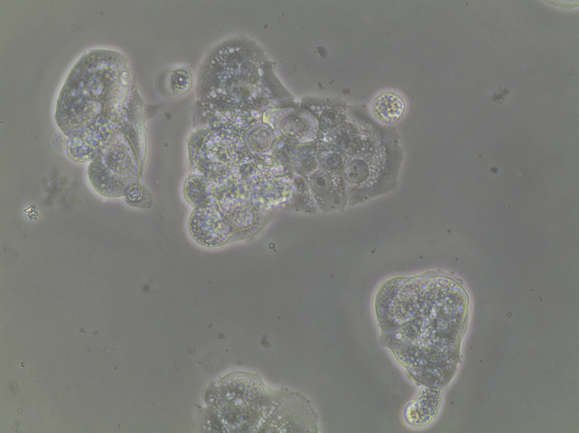** | **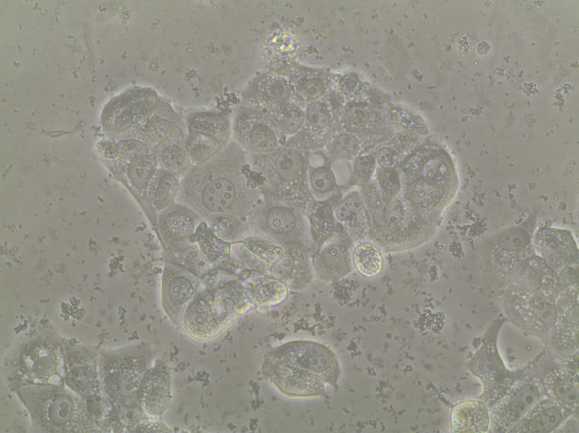** | **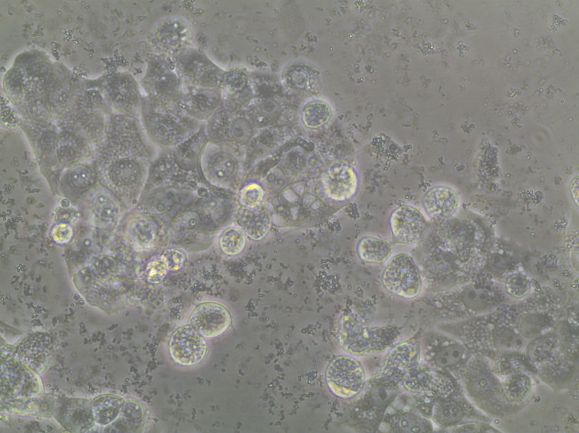** |
| **8α** | **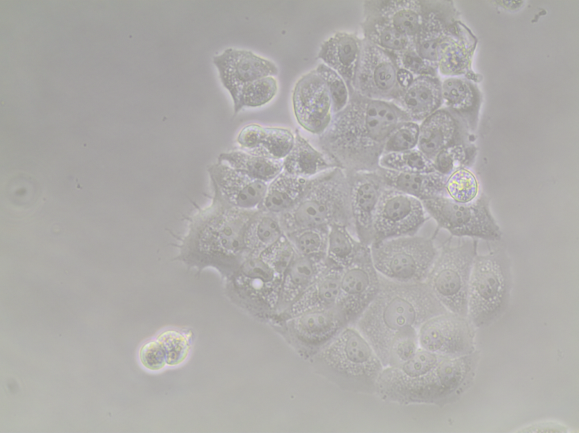** | **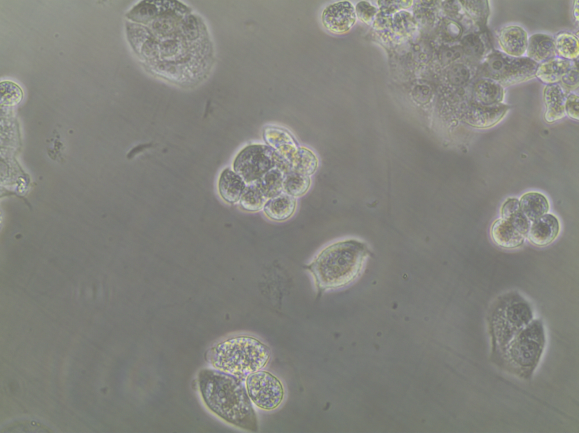** | **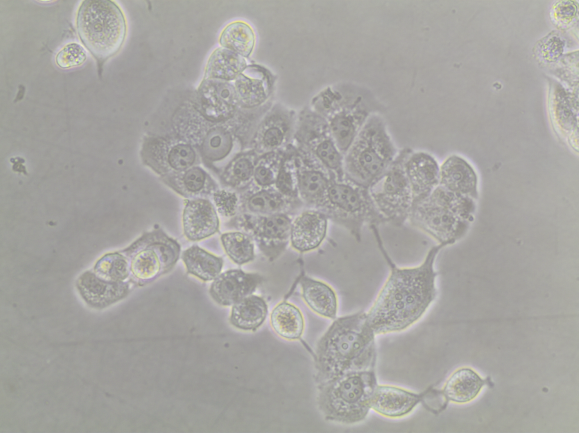** | **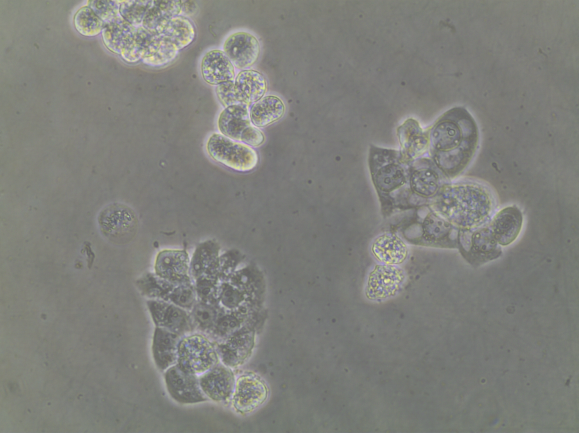** |
| **9α** | **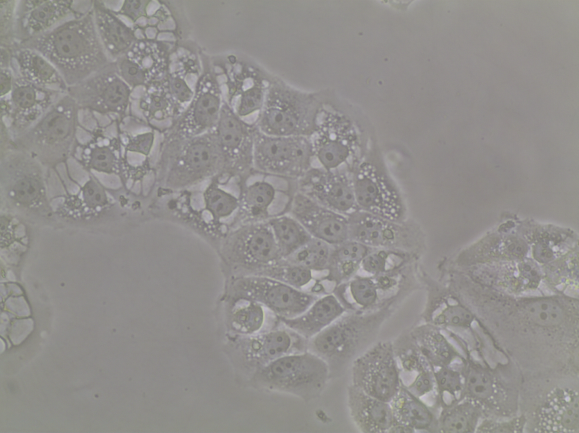** | **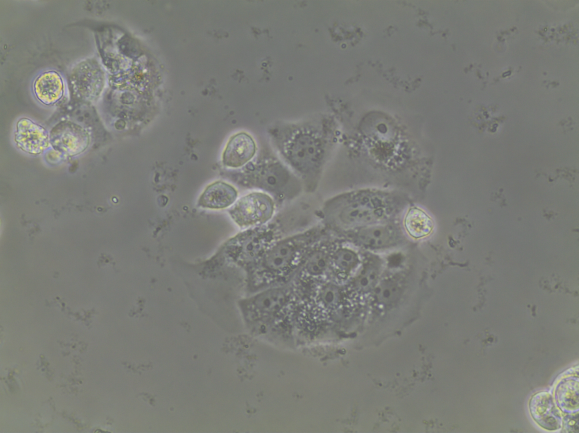** | **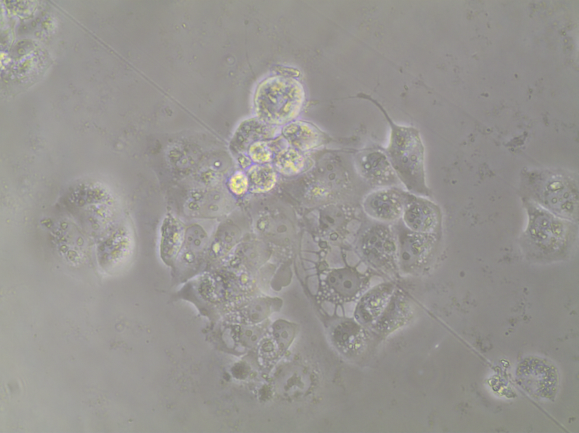** | **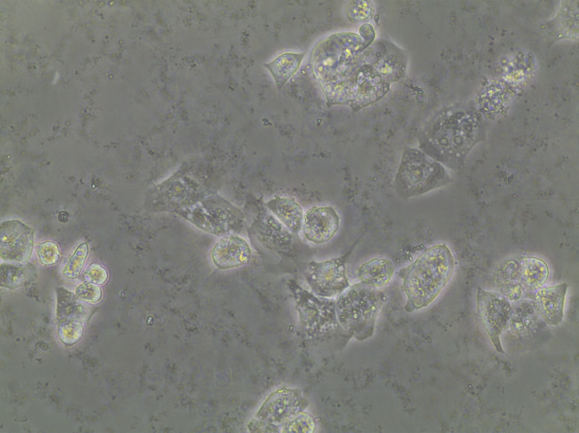** |
| **10α** | **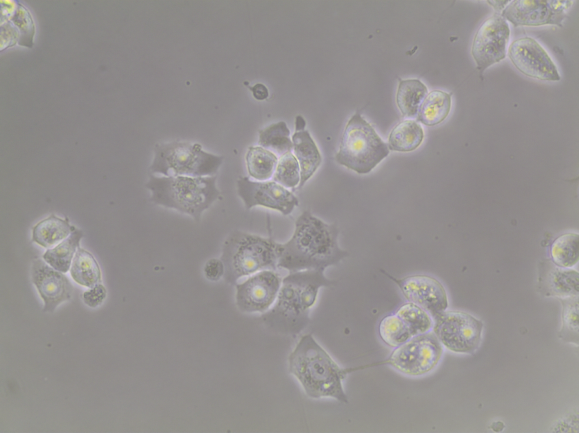** | **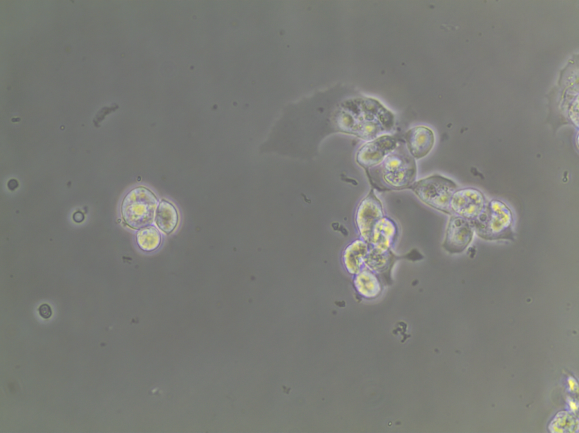** | **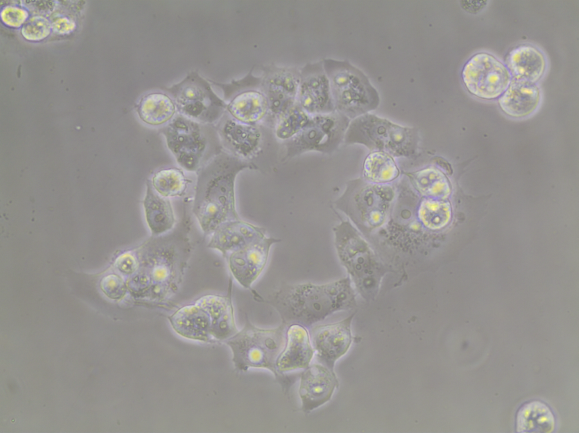** | **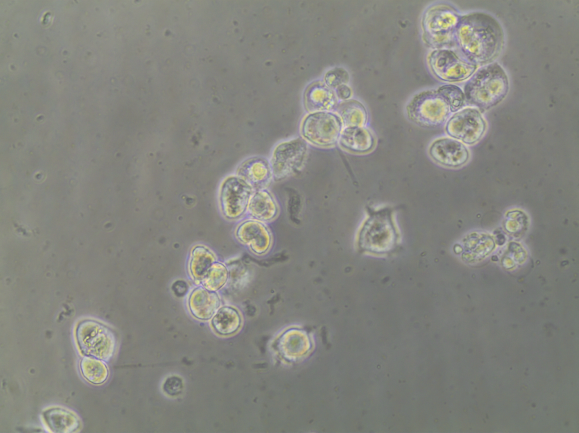** |
| **11α** | **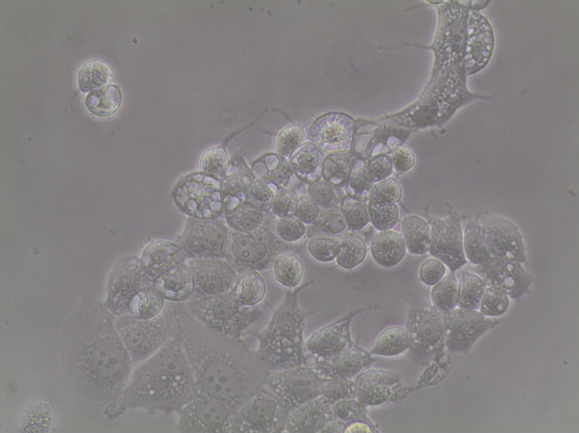** | **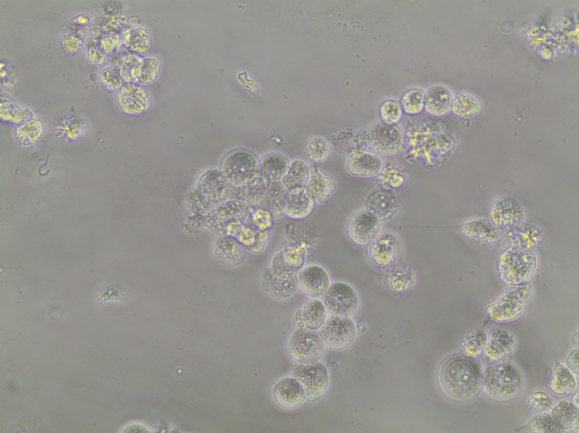** | **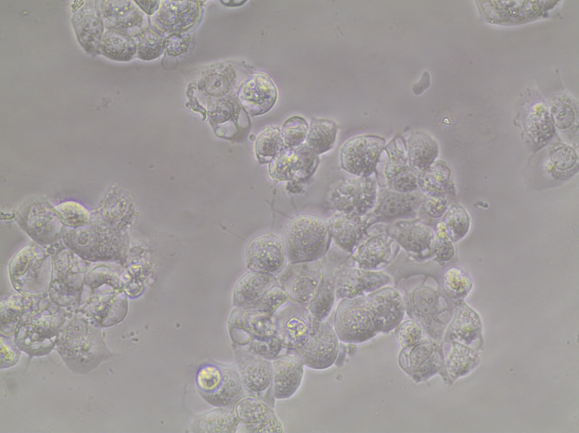** | **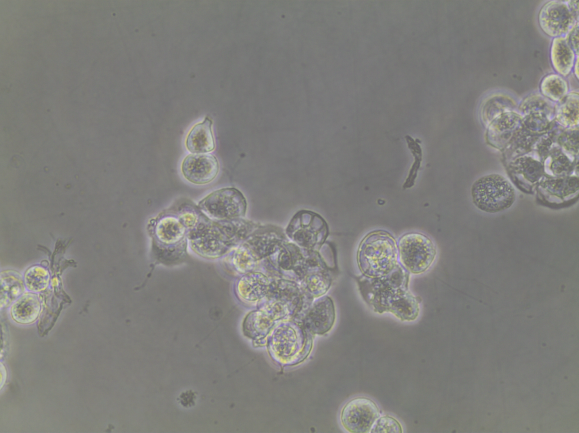** |
| **11β** | **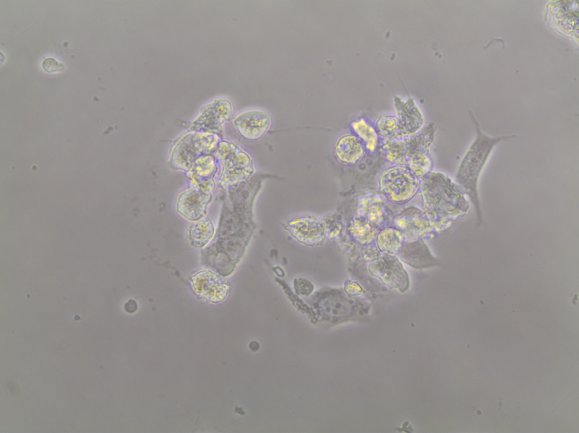** | **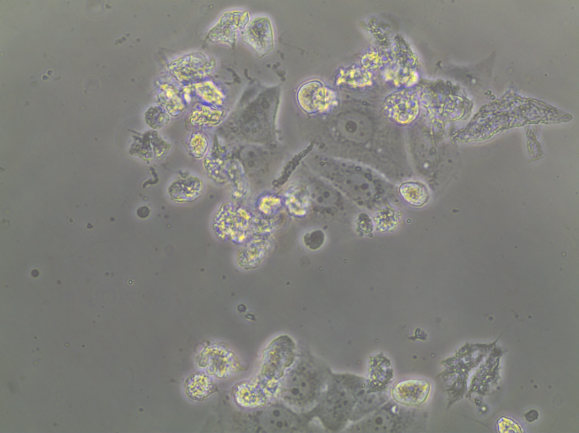** | **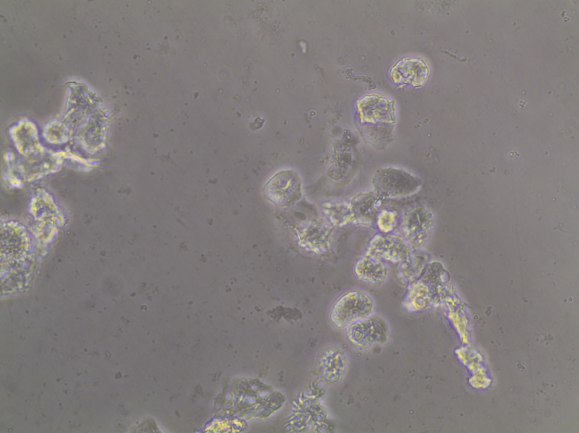** | **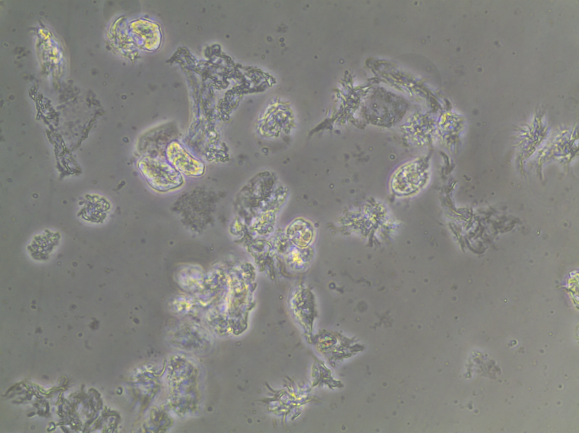** |
| **12β** | **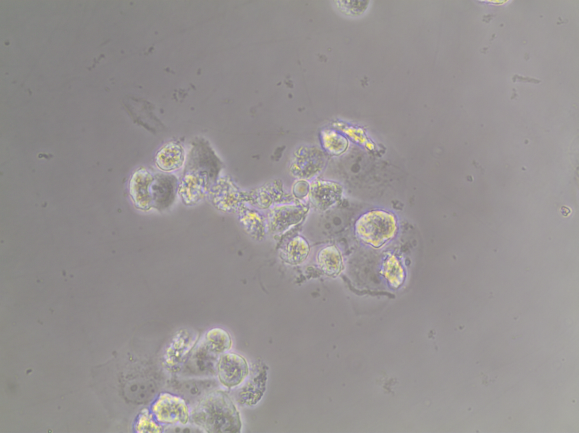** | **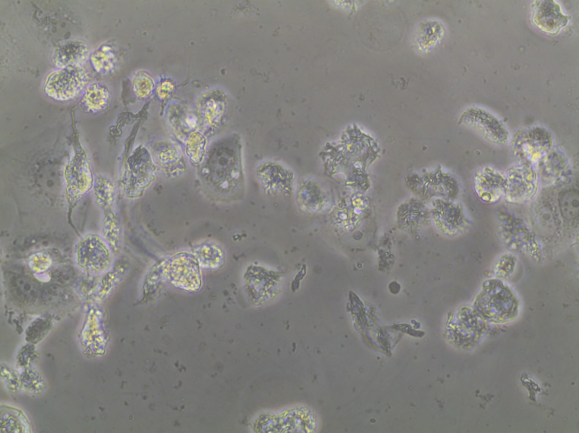** | **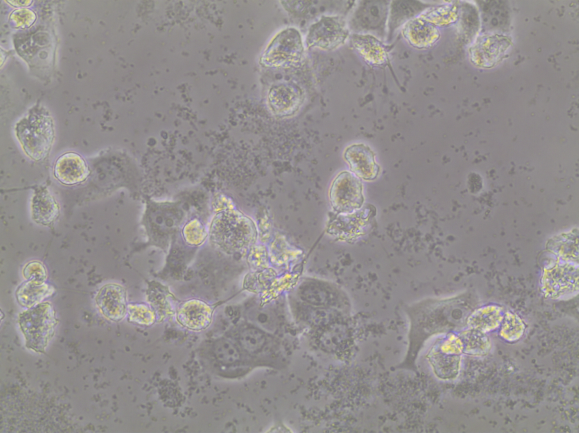** | **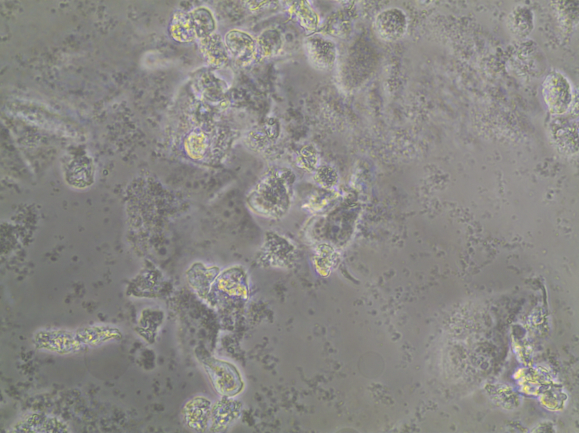** |
| **13α** | **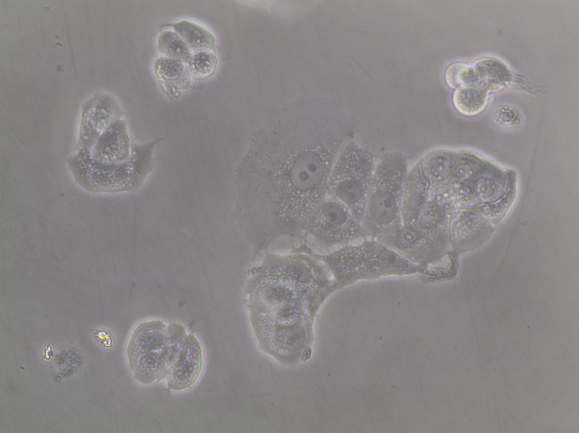** | **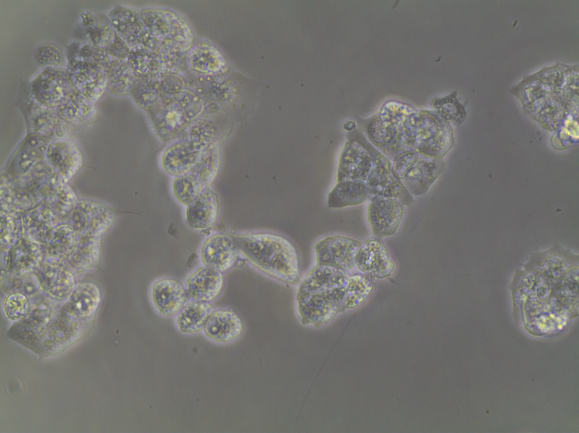** | **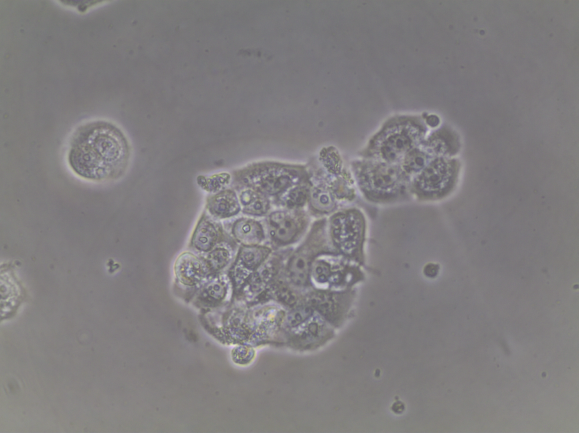** | **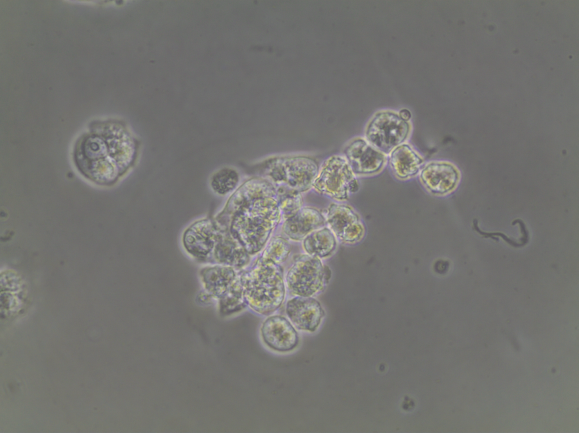** |
| **14α** | **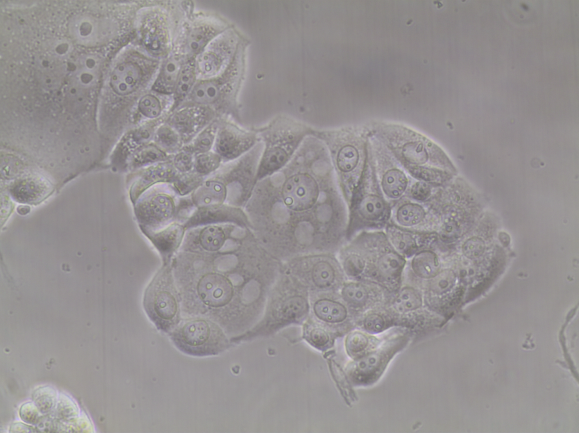** | **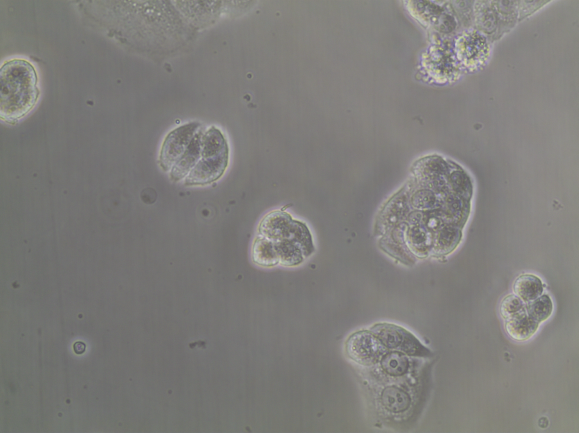** | **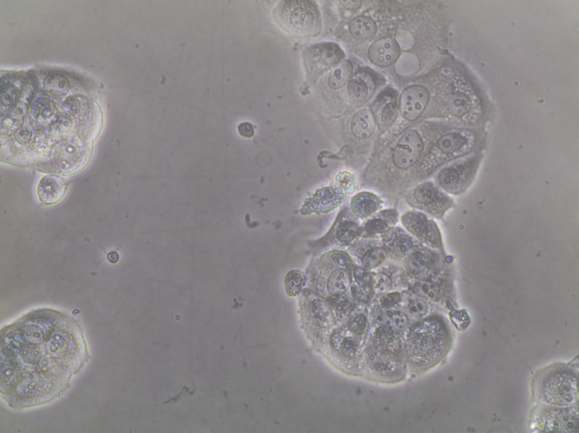** | **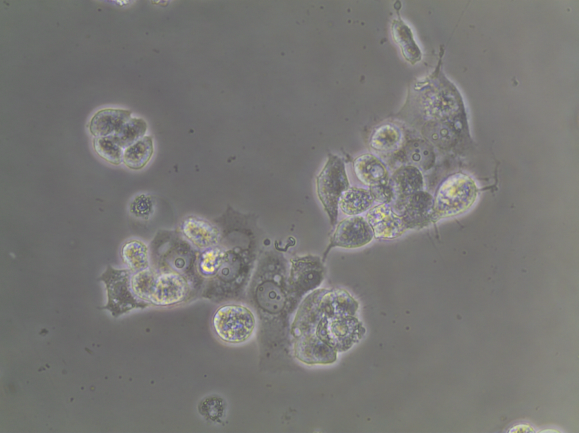** |
| **15α** | **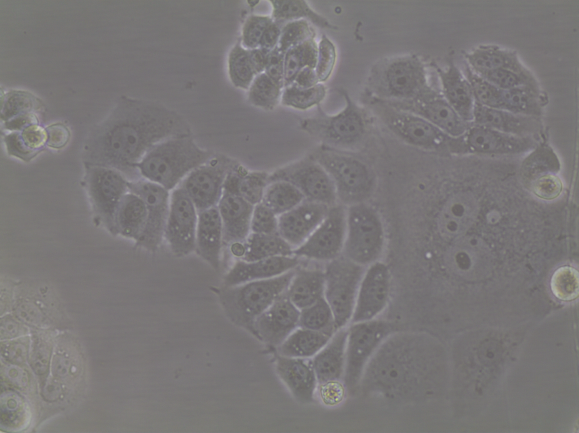** | **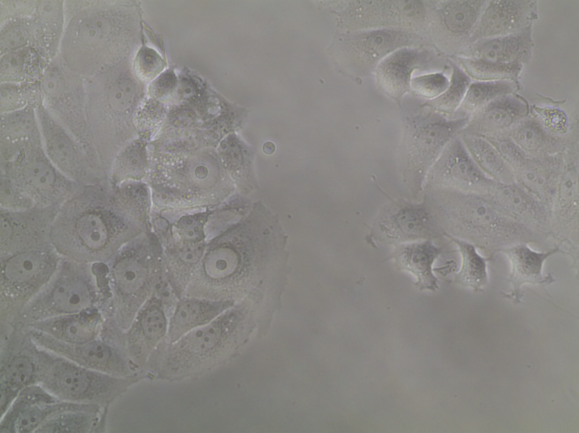** | **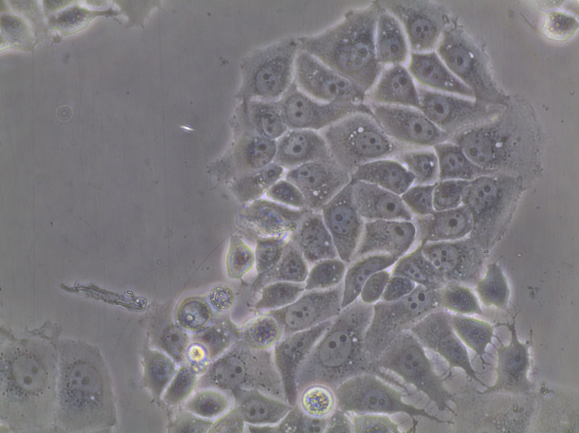** | **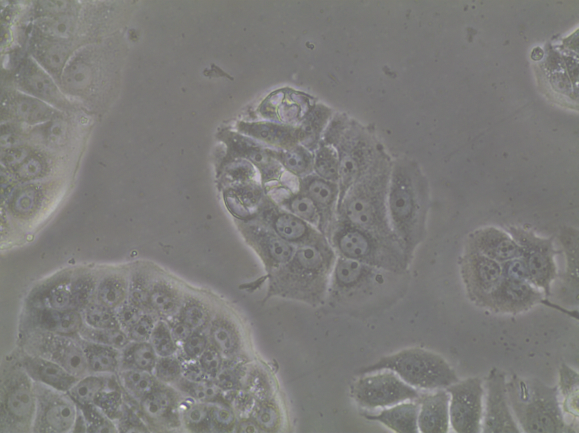** |
| **16α** | **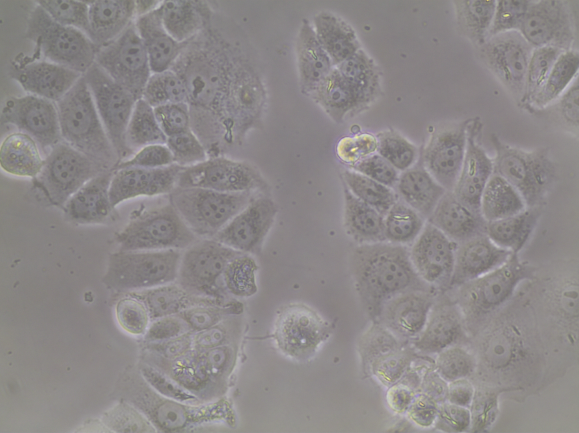** | **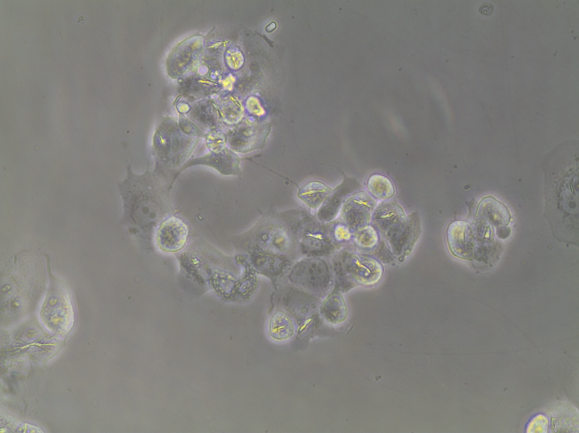** | **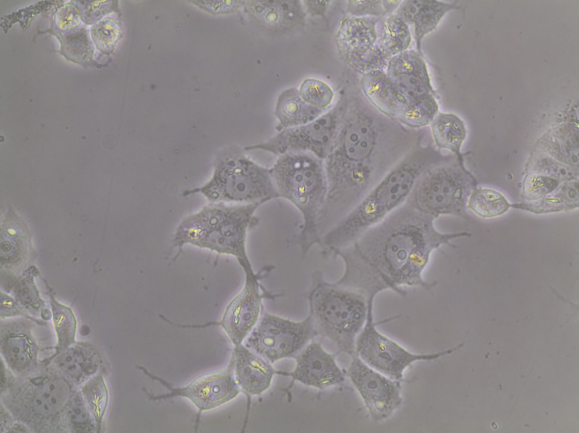** | **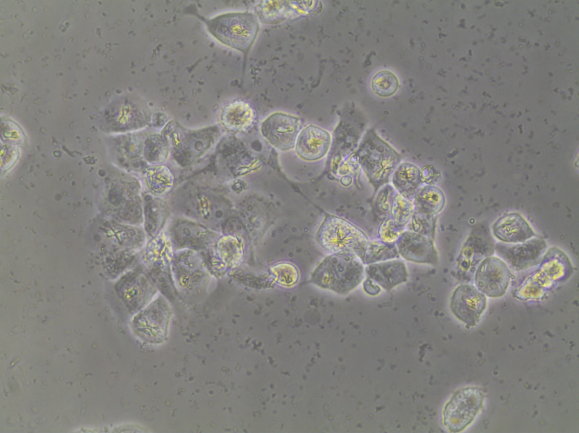** |
| **17β** | **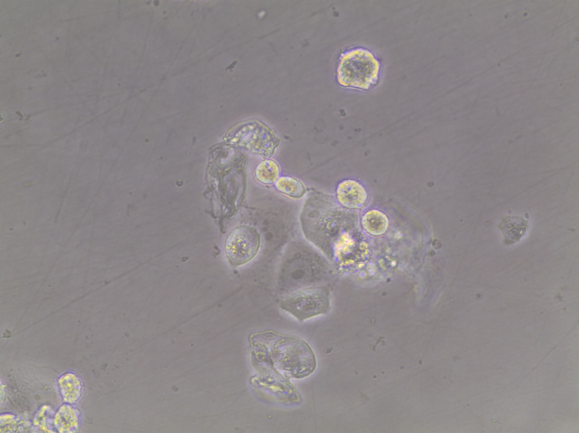** | **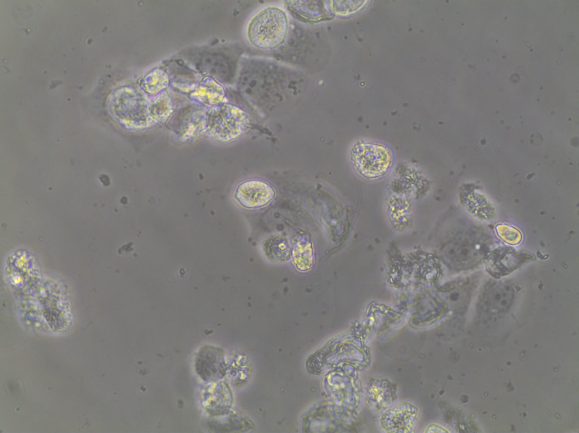** | **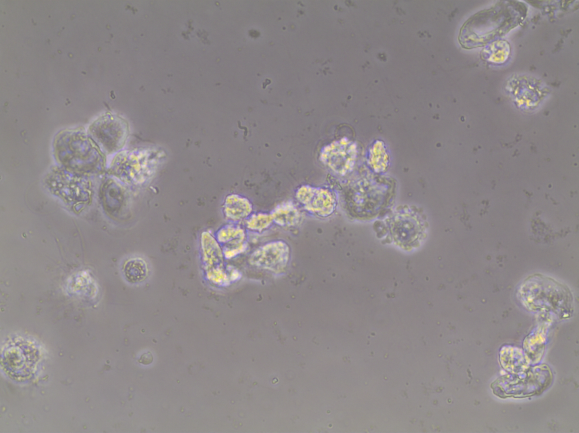** | **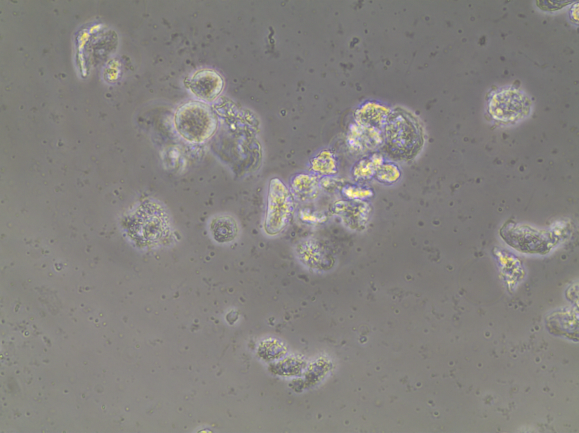** |
| **18β** | **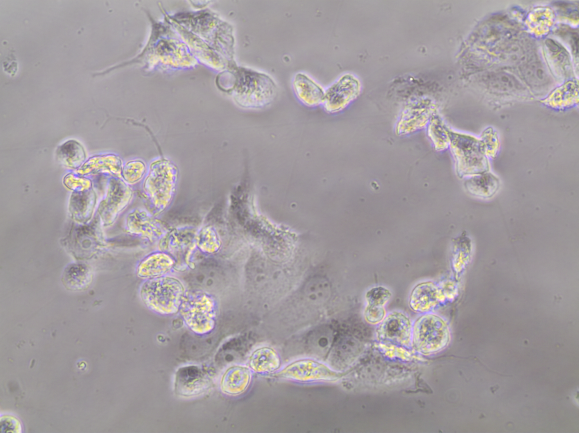** | **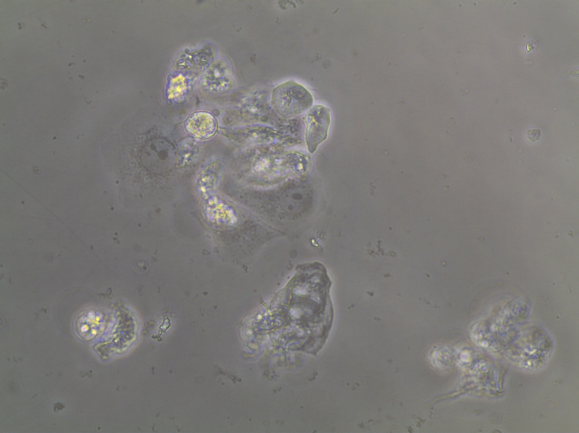** | **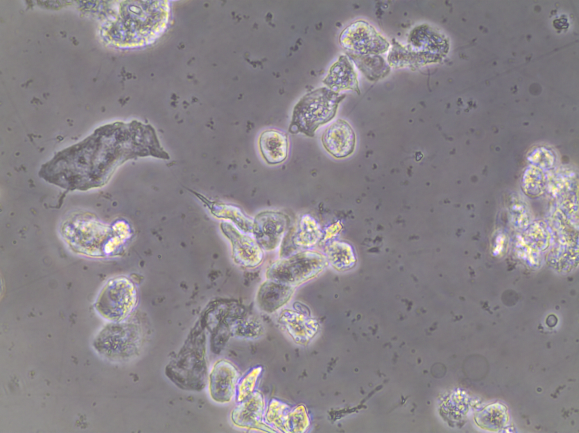** | **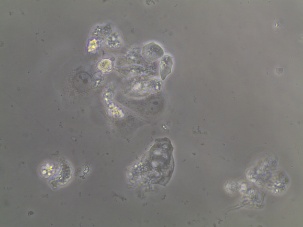** |

*** Ctrl** = control (MCF-7 cells in DMSO solution)

**Table S2**. A list of the observed morphological changes in MCF7 cancer cells after 24 h and 48 h of exposure to betulin (**BtOH**) and *O*3-betulin glycosides (**7α**-**18β**) at concentration of 25 µM and 50 µM.

| **Conc.** | **25 μM** | | | | | | **50μM** | | | | | |
| --- | --- | --- | --- | --- | --- | --- | --- | --- | --- | --- | --- | --- |
|  | **Vacuolization** | | **Blebbing/** **Shrinkage** | | **Cell death** | | **Vacuolization** | | **Blebbing/ Shrinkage** | | **Cell death** | | |
| **Time** | **24 h** | **48 h** | **24 h** | **48 h** | **24 h** | **48 h** | **24 h** | **48 h** | **24 h** | **48 h** | **24 h** | **48 h** |
| **BtOH** |  |  | **+** | **+** | **+** | **+** |  |  | **+** | **+** | **+** | **+** |
| **7α** |  |  |  | **+** | **+** | **+** |  |  |  | **+** | **+** | **+** |
| **8α** | **+** |  |  | **+** | **+** | **+** |  |  |  | **+** | **+** | **+** |
| **9α** | **+** |  |  | **+** | **+** | **+** | **+** |  |  | **+** | **+** | **+** |
| **10α** |  |  | **+** | **+** | **+** | **+** |  |  | **+** | **+** | **+** | **+** |
| **11α** | **+** |  |  | **+** | **+** | **+** | **+** | **+** |  | **+** | **+** | **+** |
| **11β** |  |  | **+** | **+** | **+** | **+** |  |  | **+** | **+** | **+** | **+** |
| **12β** |  |  | **+** | **+** | **+** | **+** |  |  | **+** | **+** | **+** | **+** |
| **13α** |  |  | **+** | **+** | **+** | **+** |  |  | **+** | **+** | **+** | **+** |
| **14α** | **+** |  | **+** | **+** | **+** | **+** | **+** |  | **+** | **+** | **+** | **+** |
| **15α** | **+** | **+** |  |  |  | **+** | **+** | **+** |  |  | **+** | **+** |
| **16α** | **+** |  | **+** | **+** | **+** | **+** | **+** |  | **+** | **+** | **+** | **+** |
| **17β** |  |  | **+** | **+** | **+** | **+** |  |  | **+** | **+** | **+** | **+** |
| **18β** |  |  | **+** | **+** | + | **+** |  |  | + | **+** | + | **+** |

**
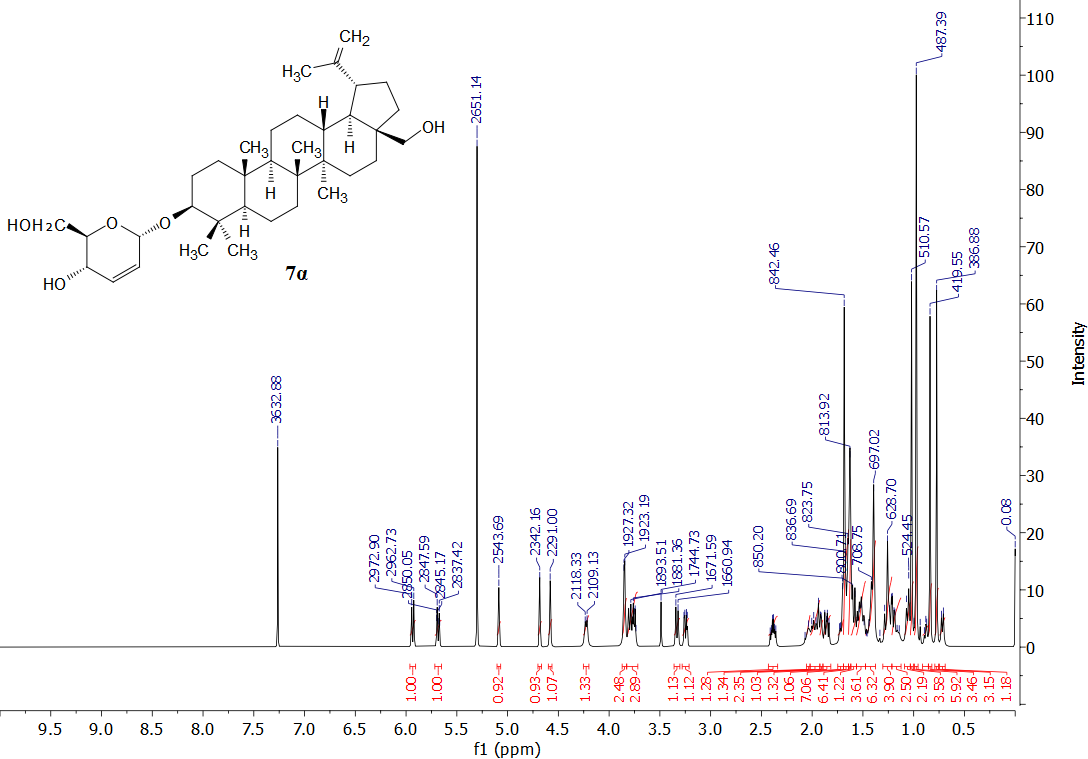
**

**
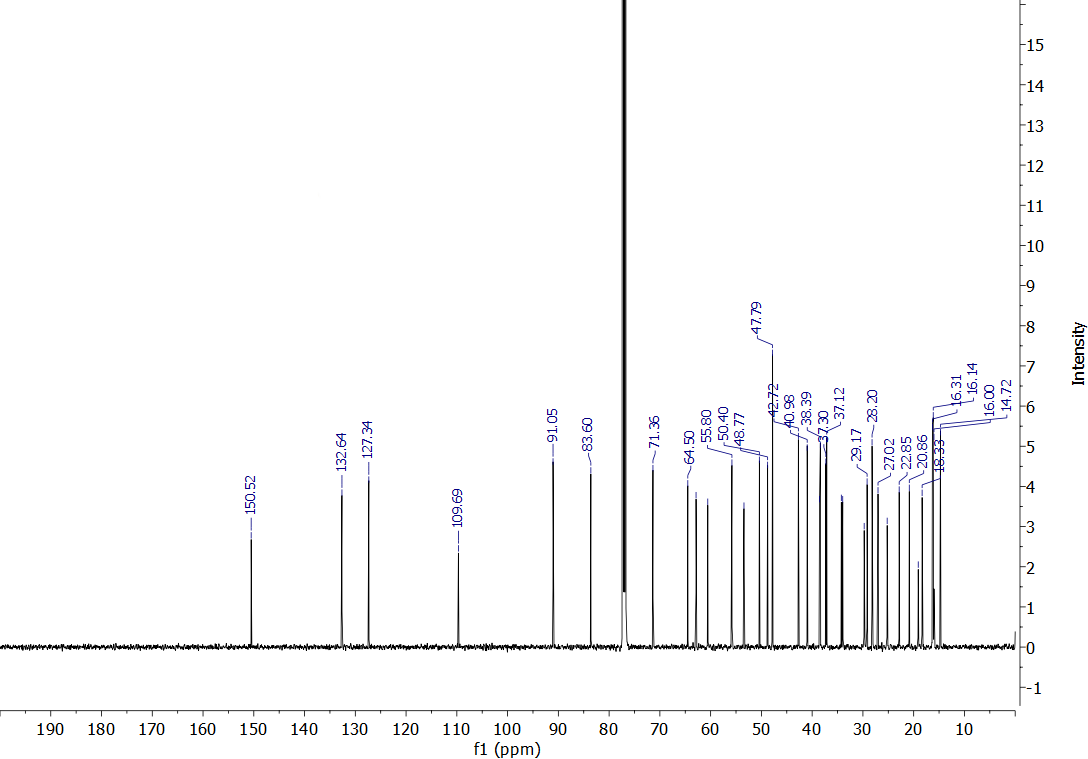
**

**Figure S2.** 1H and 13C NMR spectra of **7α**.

**
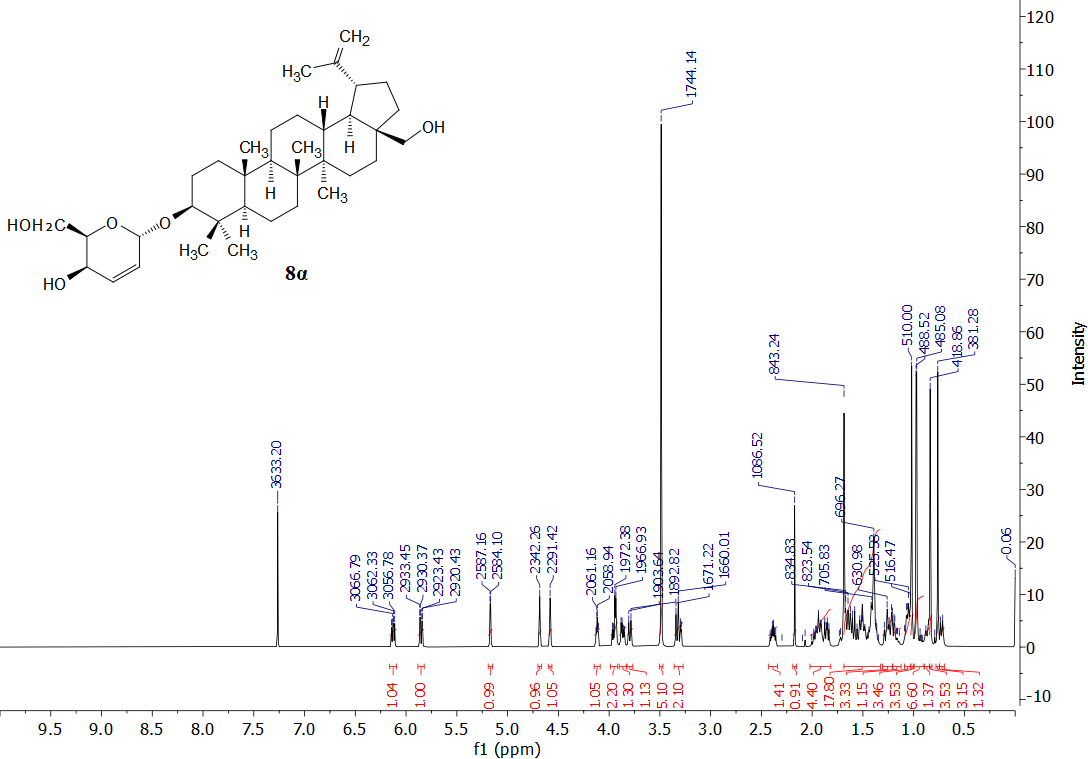
**

**
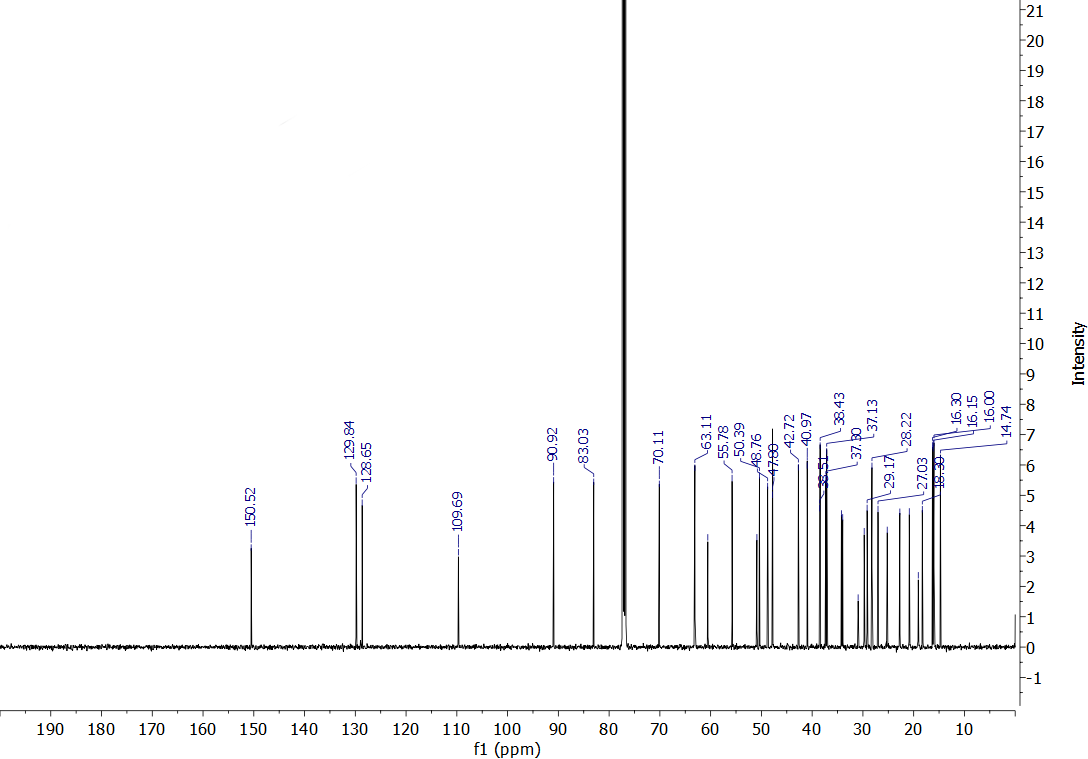
**

**Figure S3.** 1H and 13C NMR spectra of **8α**.

**
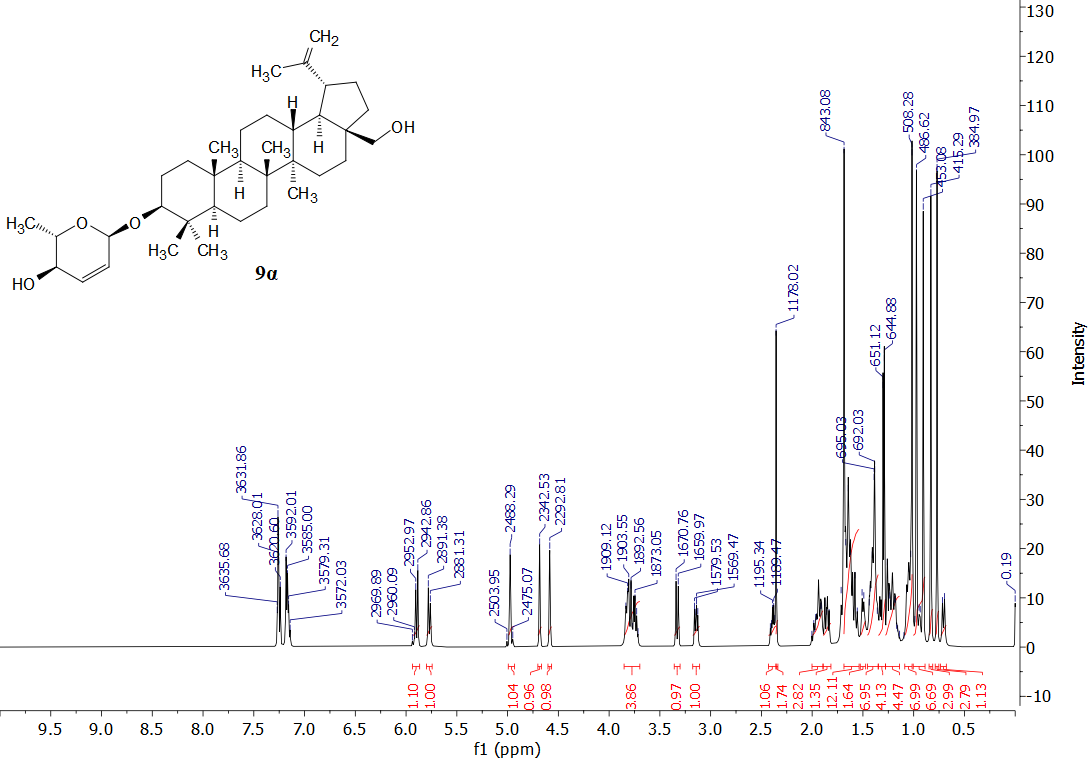
**

**
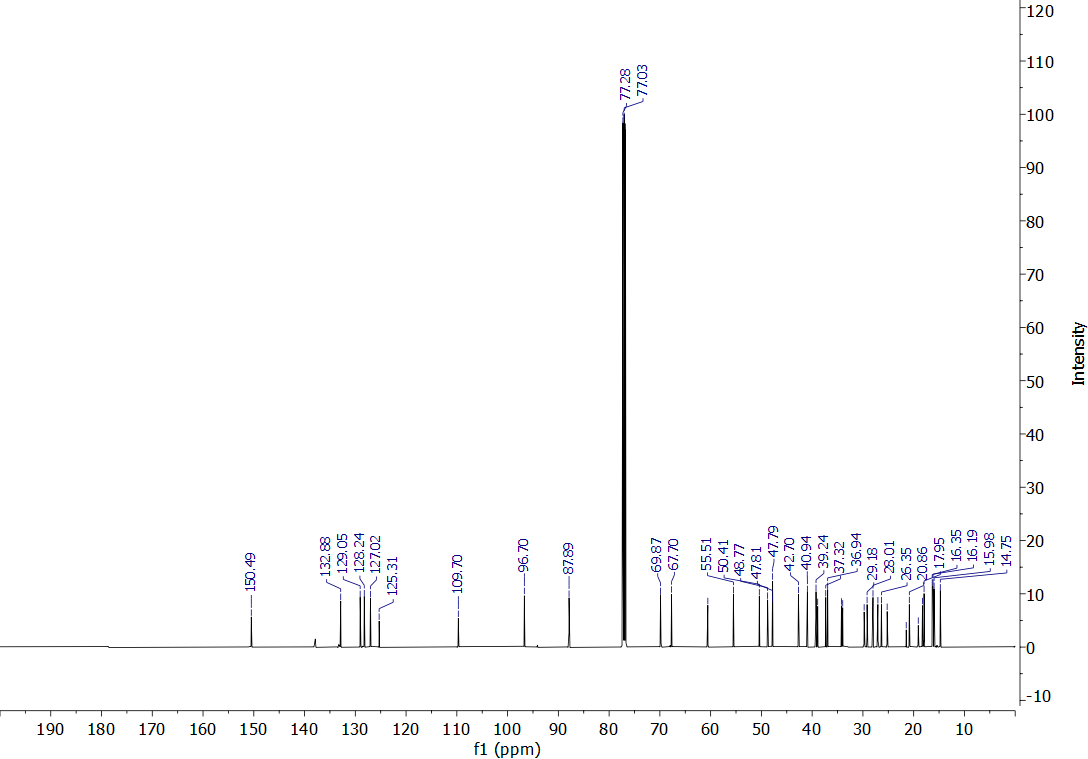
**

**Figure S4.** 1H and 13C NMR spectra of **9α**.

**
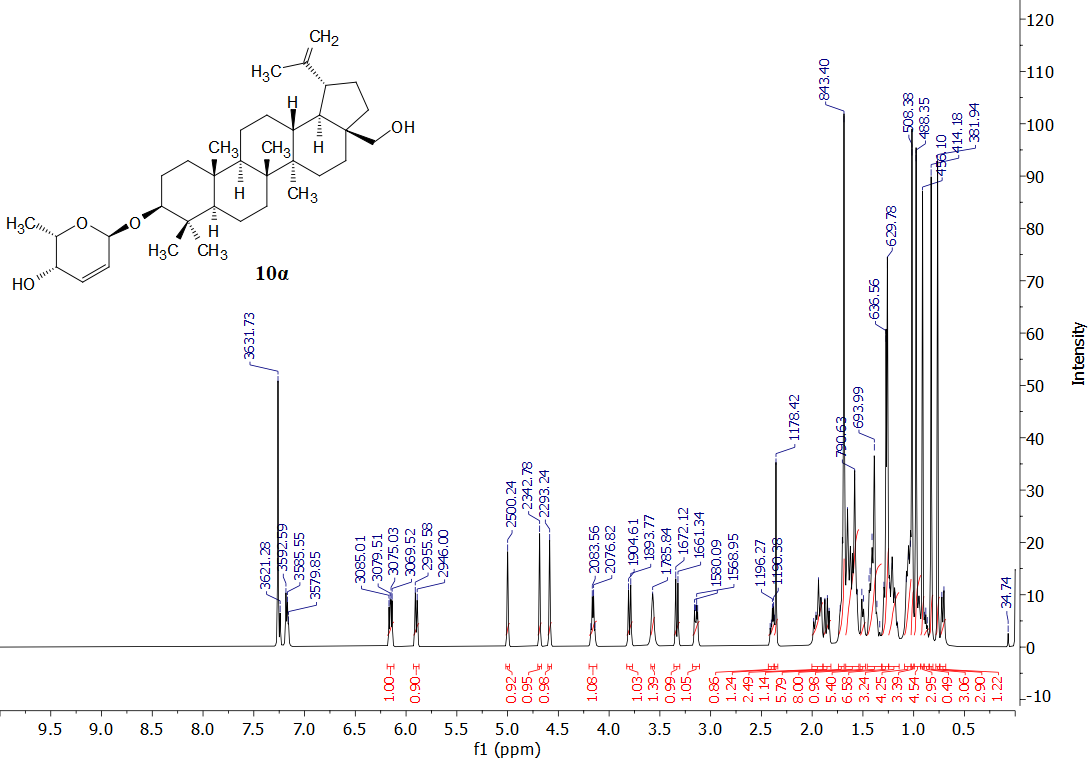
**

**
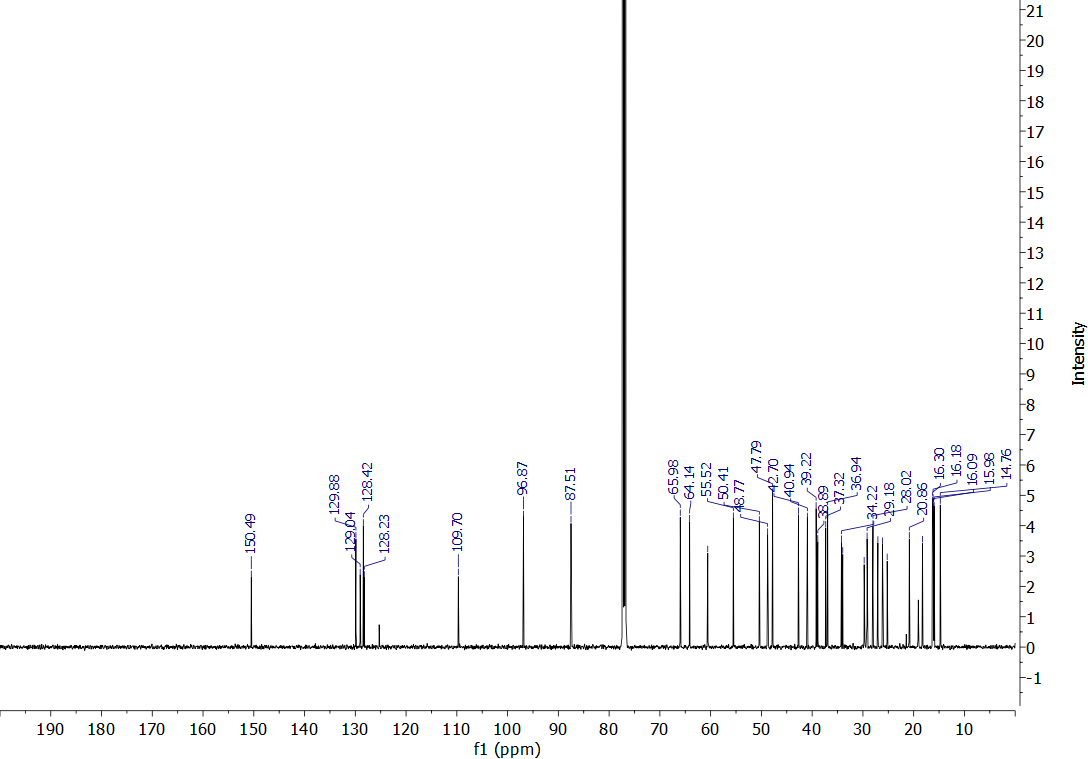
**

**Figure S5.** 1H and 13C NMR spectra of **10α**.

**
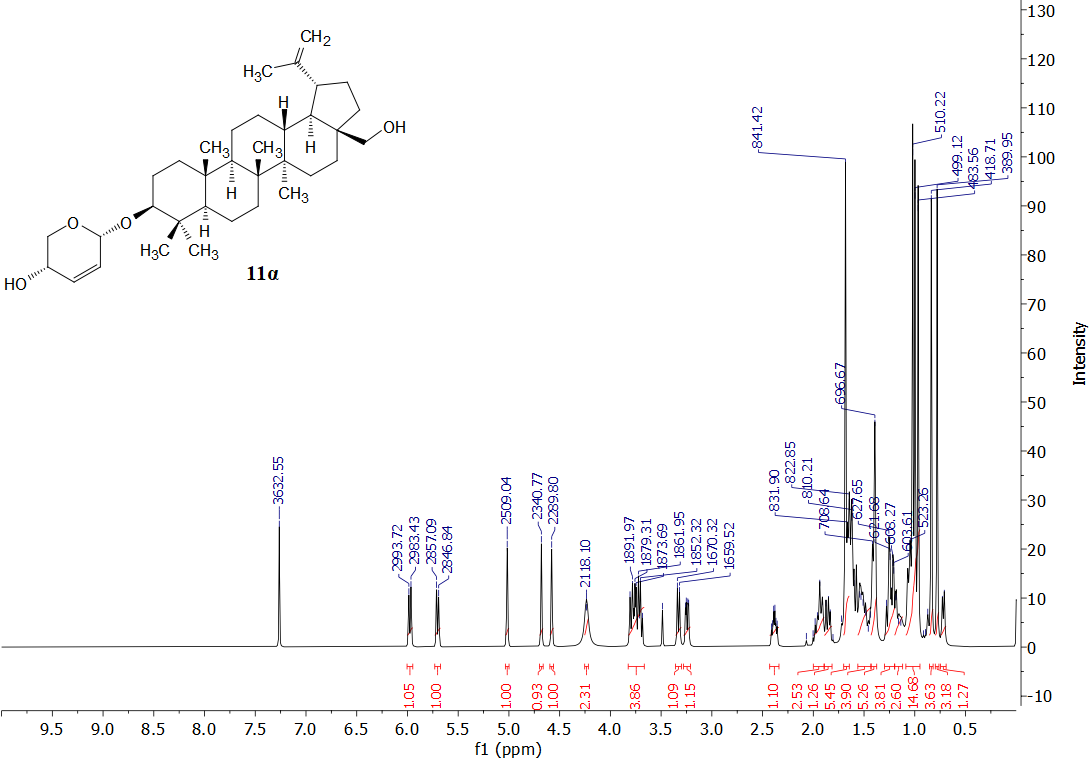
**

**
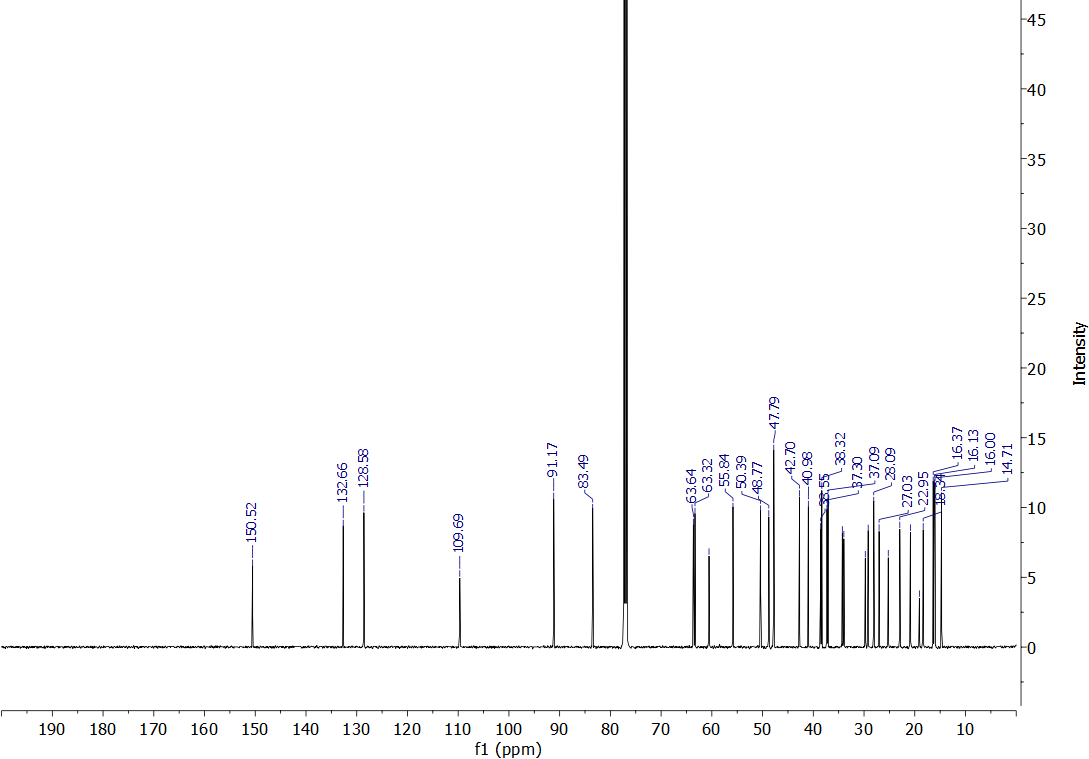
**

**Figure S6.** 1H and 13C NMR spectra of **11α**.

**
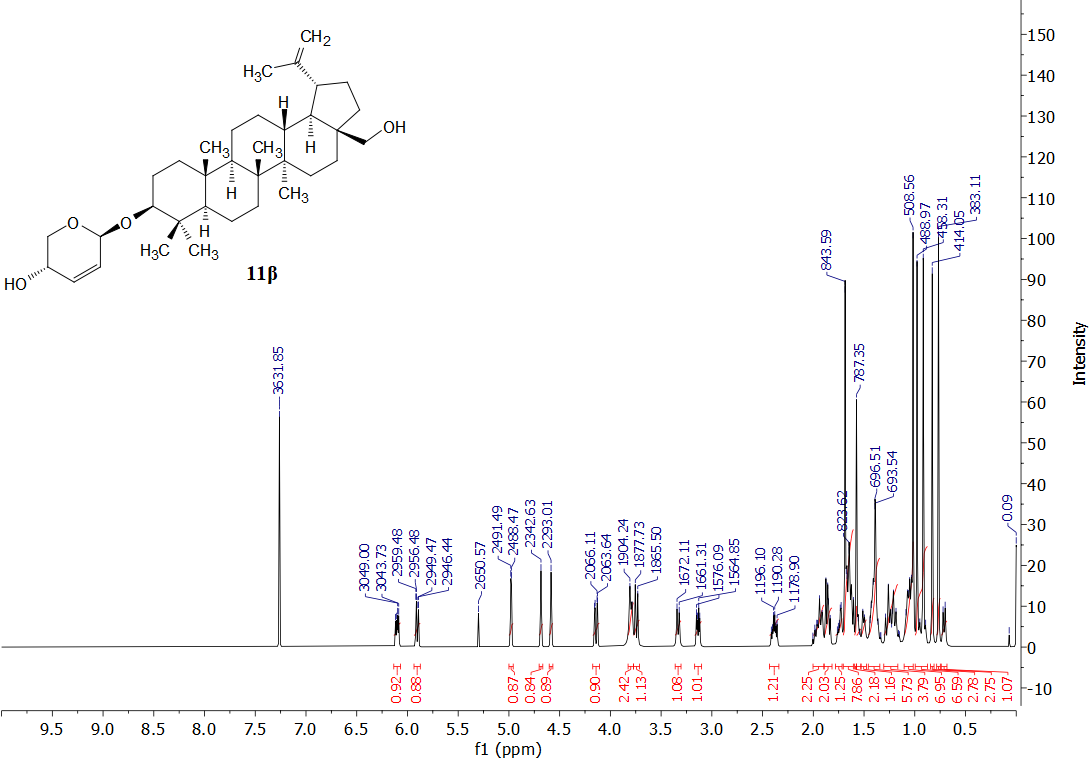
**

**
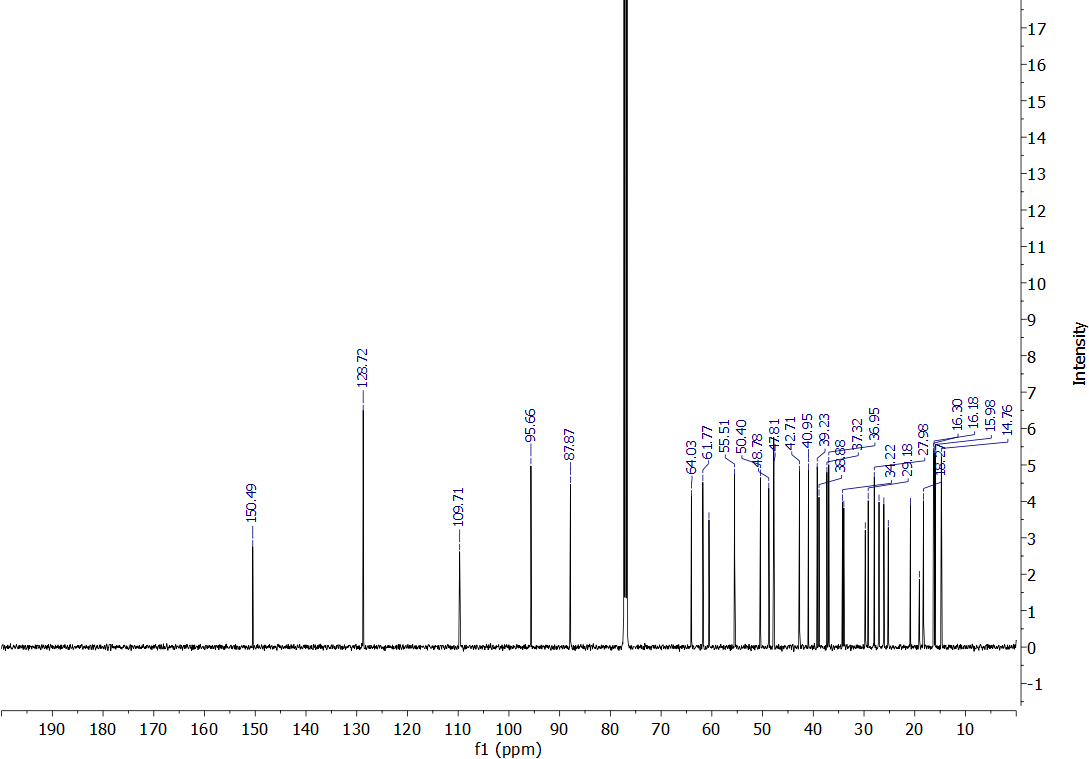
**

**Figure S7.** 1H and 13C NMR spectra of **11β**.

**
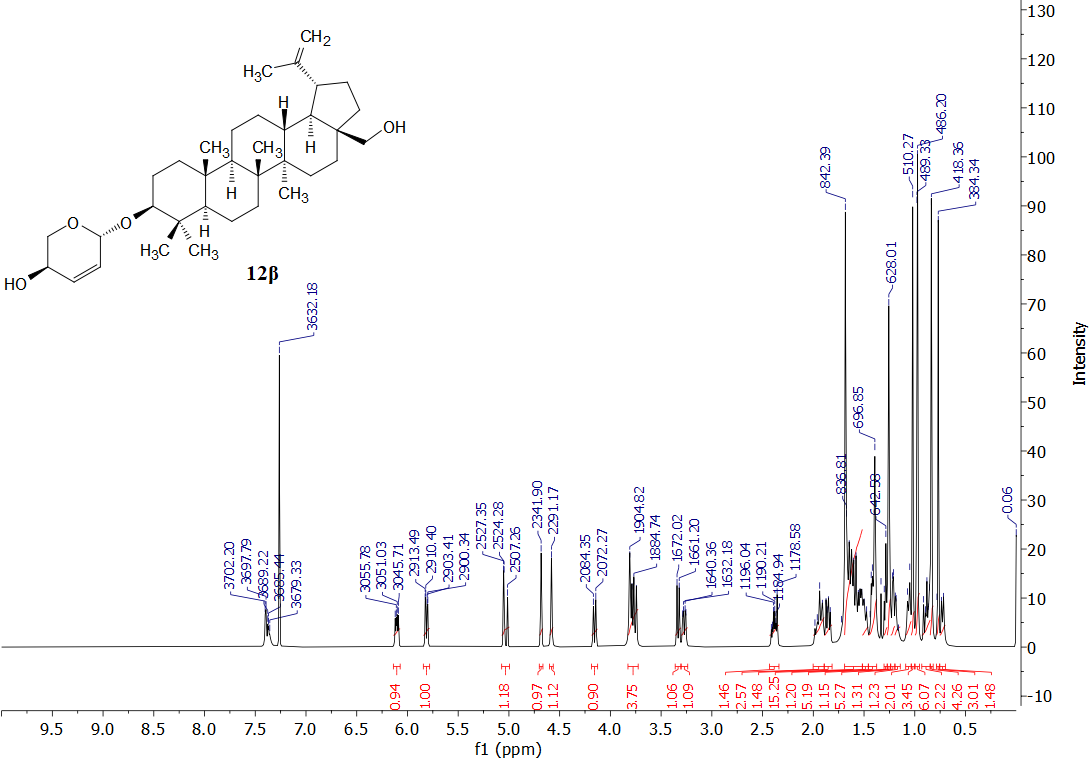
**

**
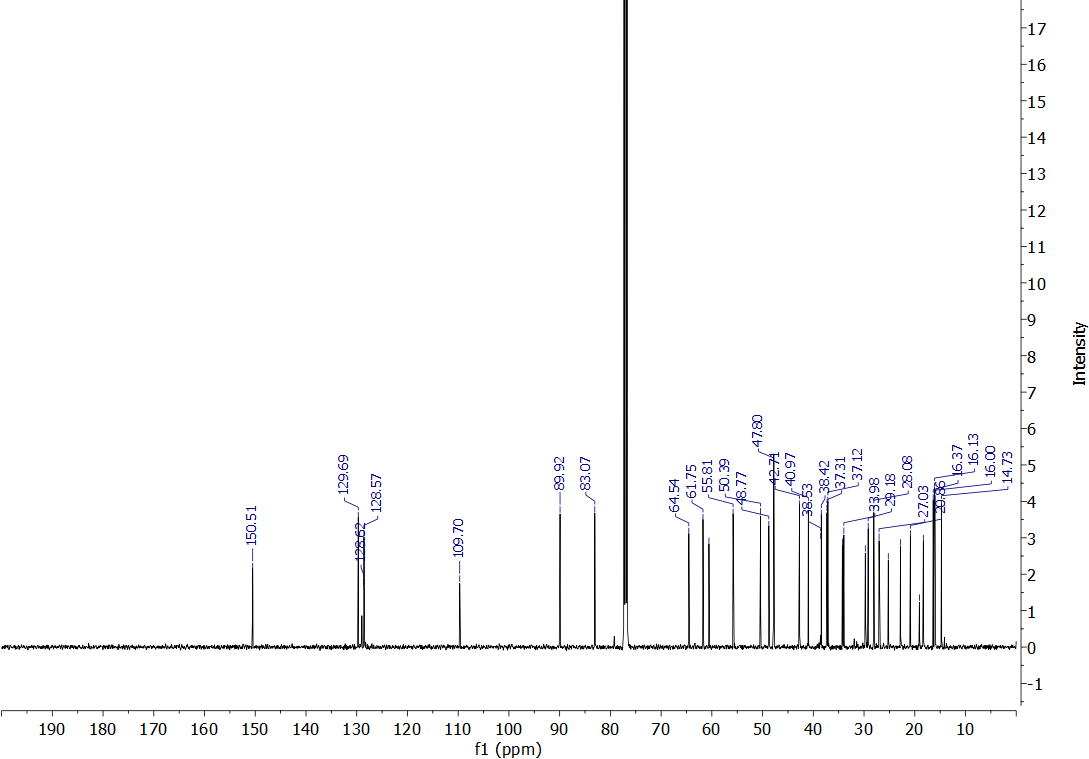
**

**Figure S8.** 1H and 13C NMR spectra of **12β**.

**
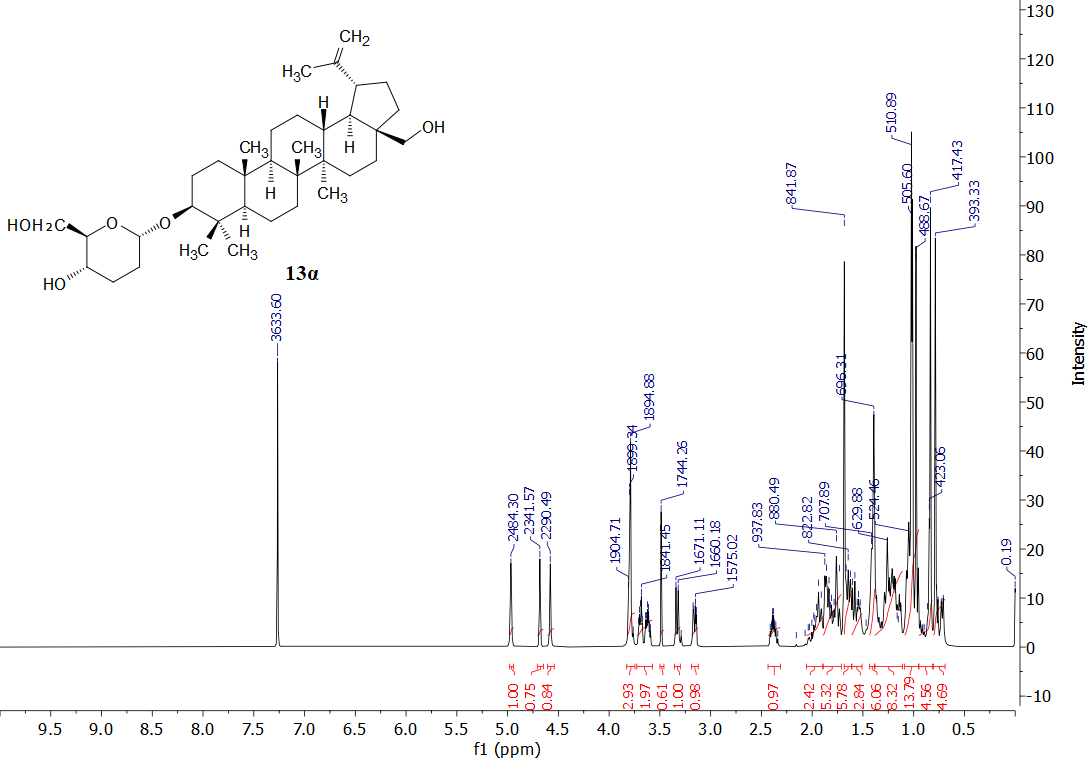
**

**
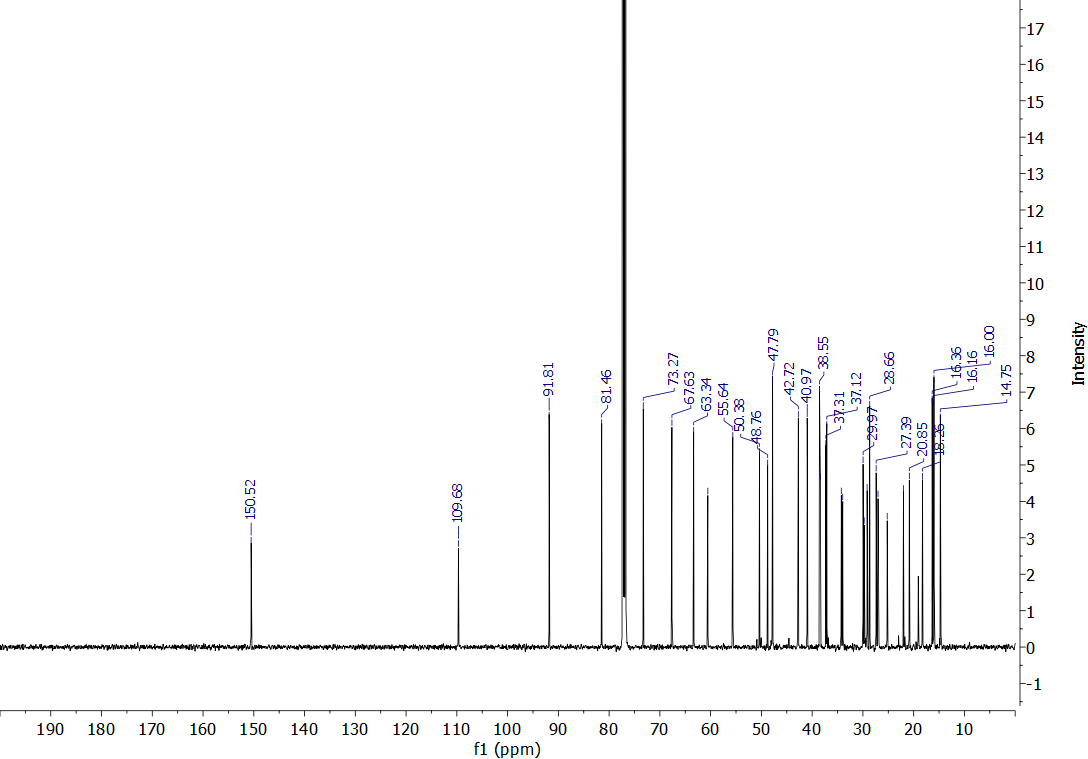
**

**Figure S9.** 1H and 13C NMR spectra of **13α**.

**
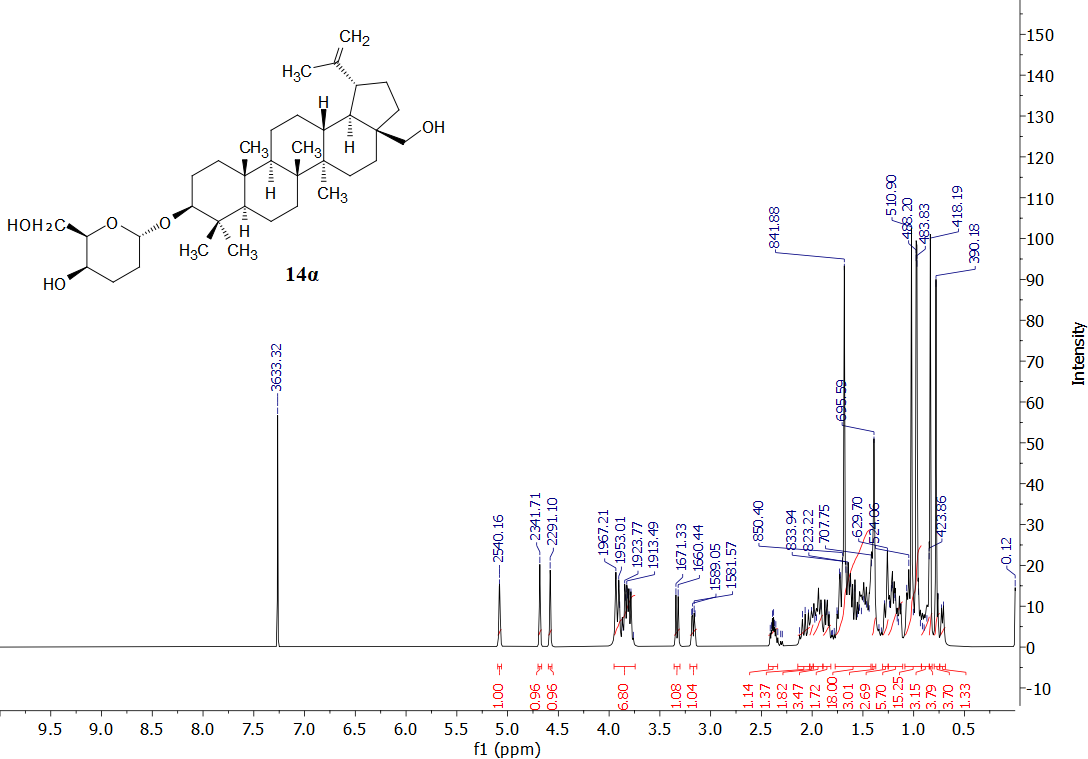
**

**
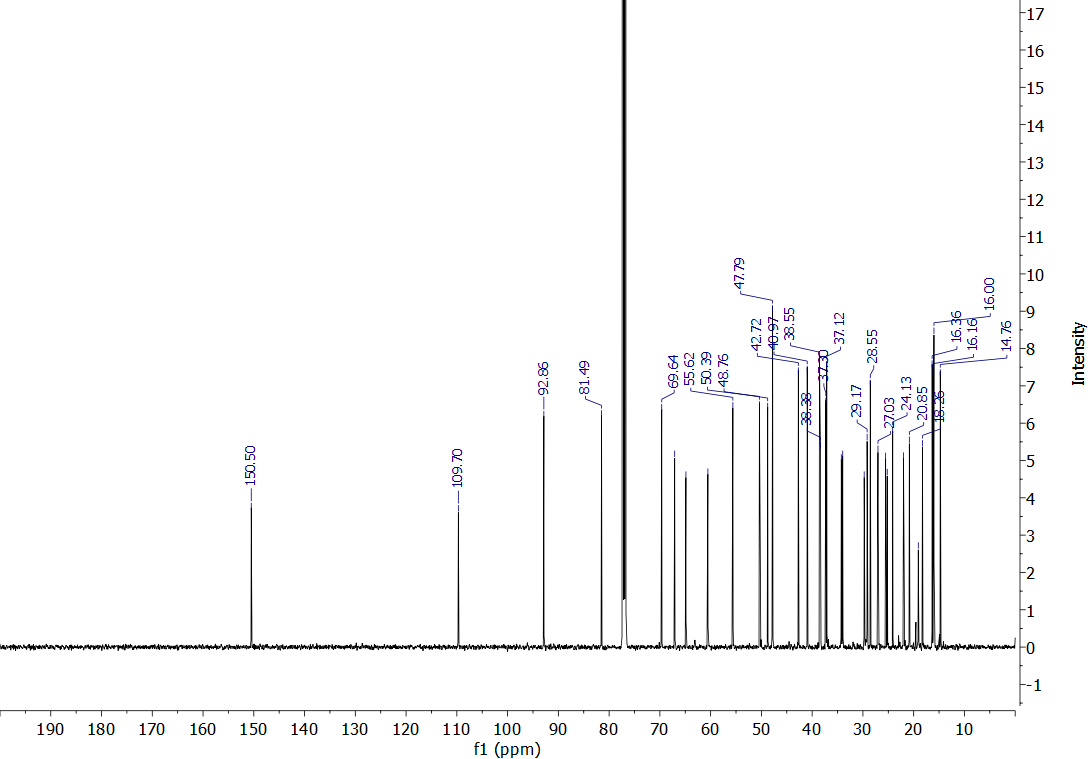
**

**Figure S10.** 1H and 13C NMR spectra of **14α**.

**
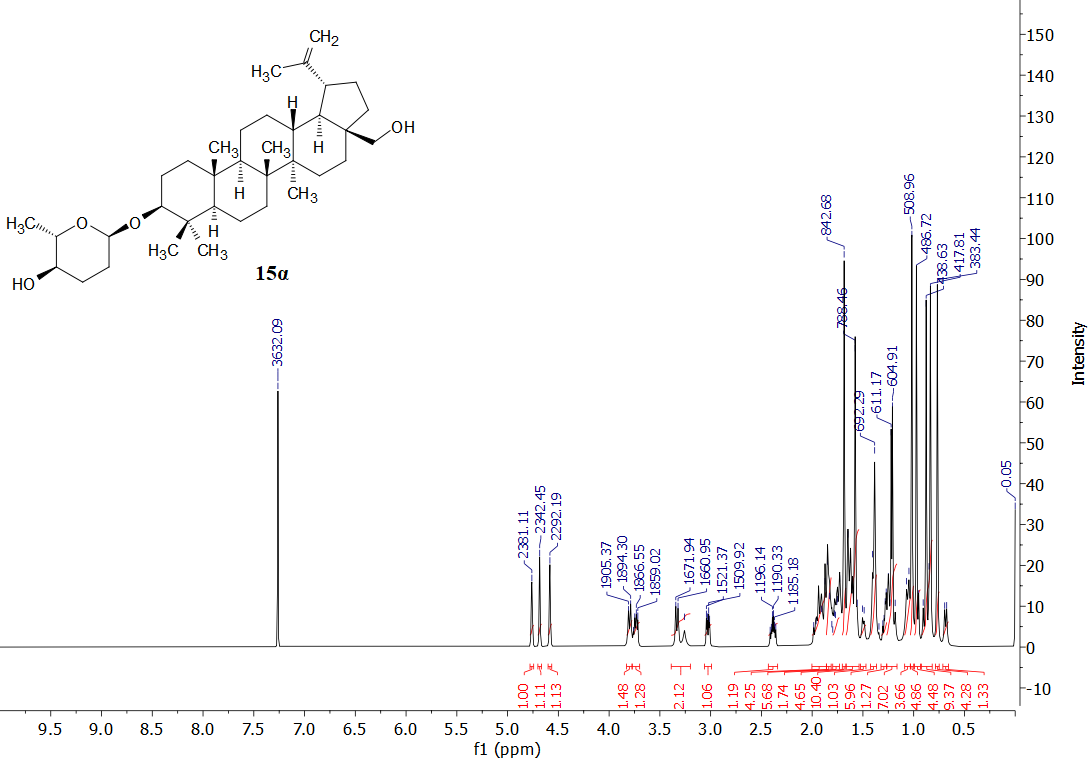
**

**
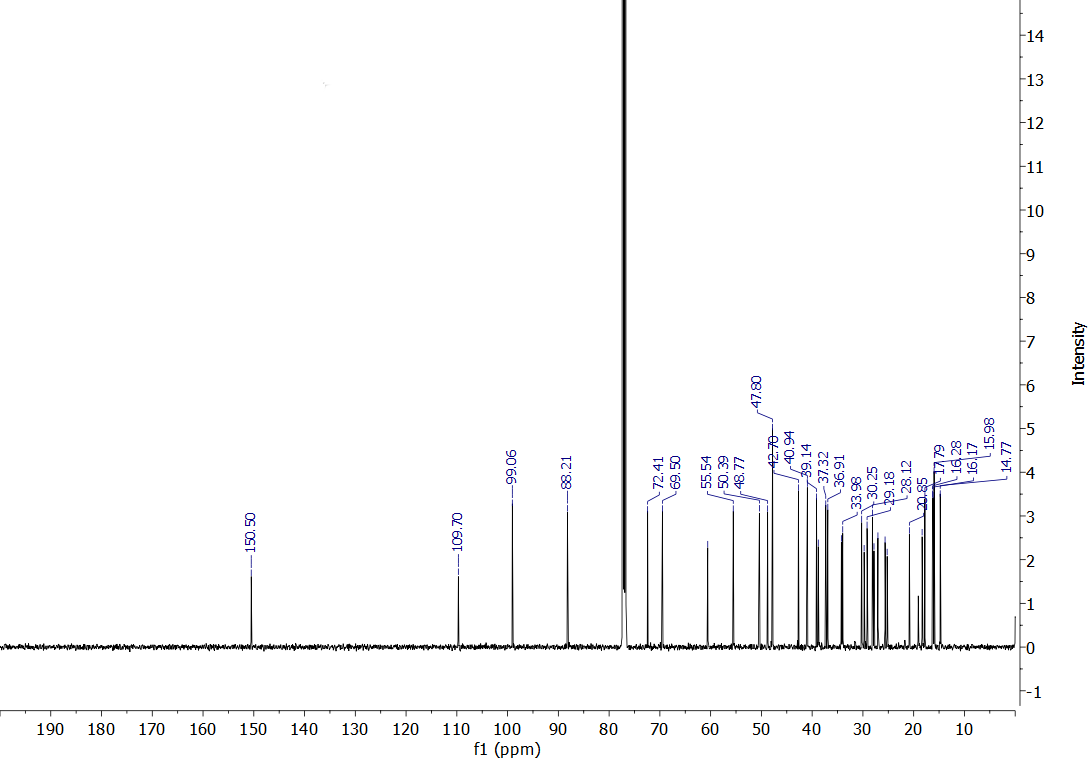
**

**Figure S11.** 1H and 13C NMR spectra of **15α**.

**
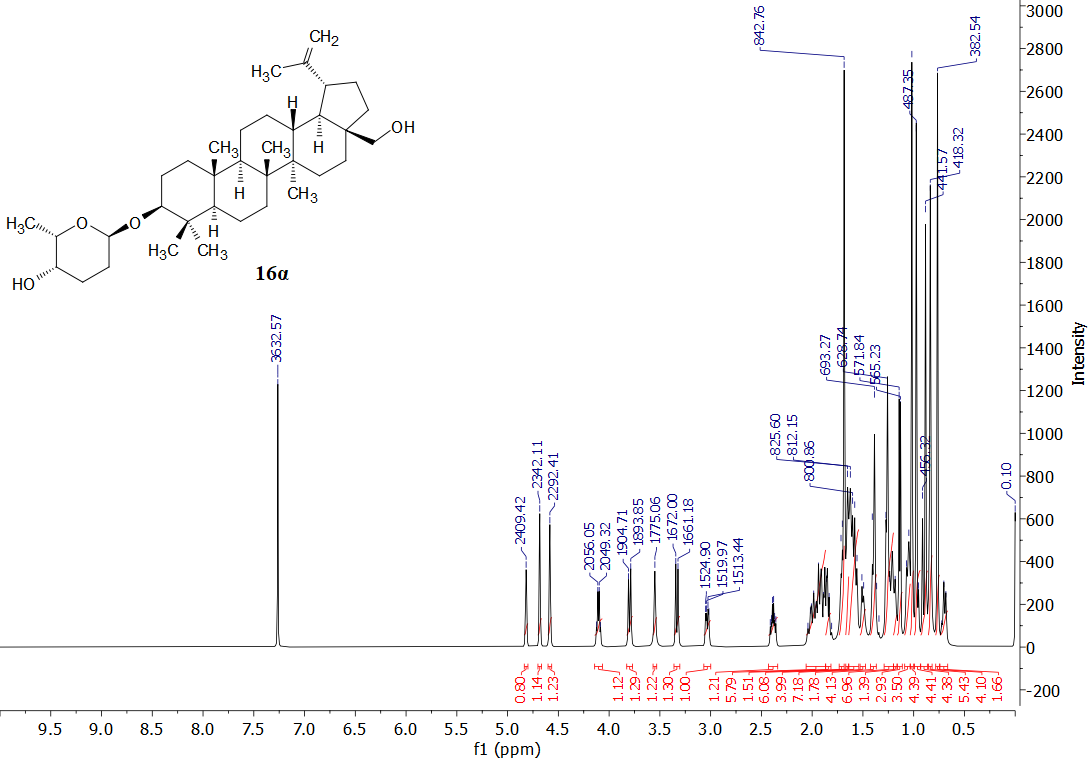
**

**
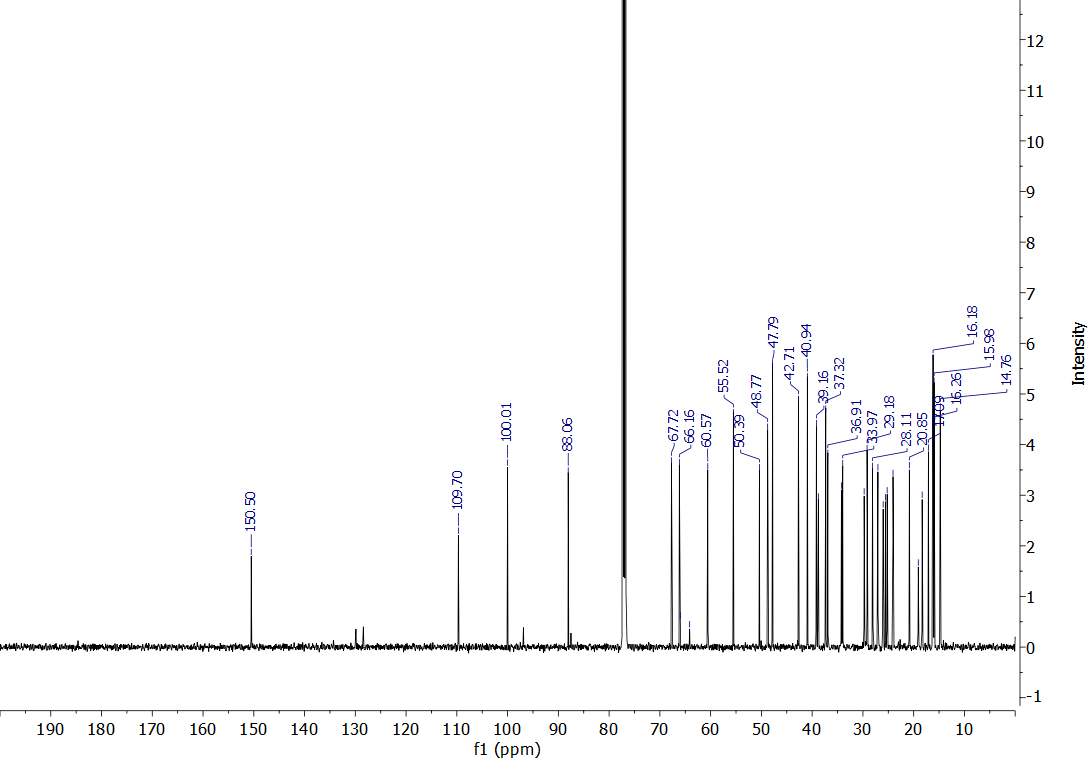
**

**Figure S12.** 1H and 13C NMR spectra of **16α**.

**
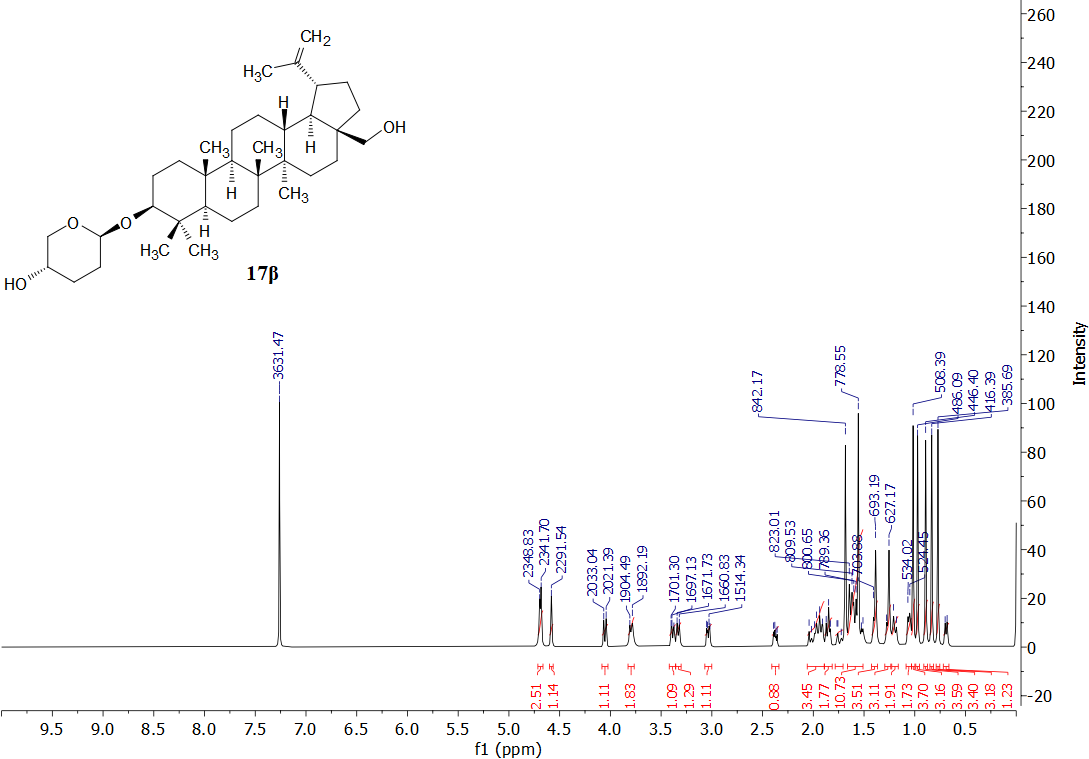
**

**
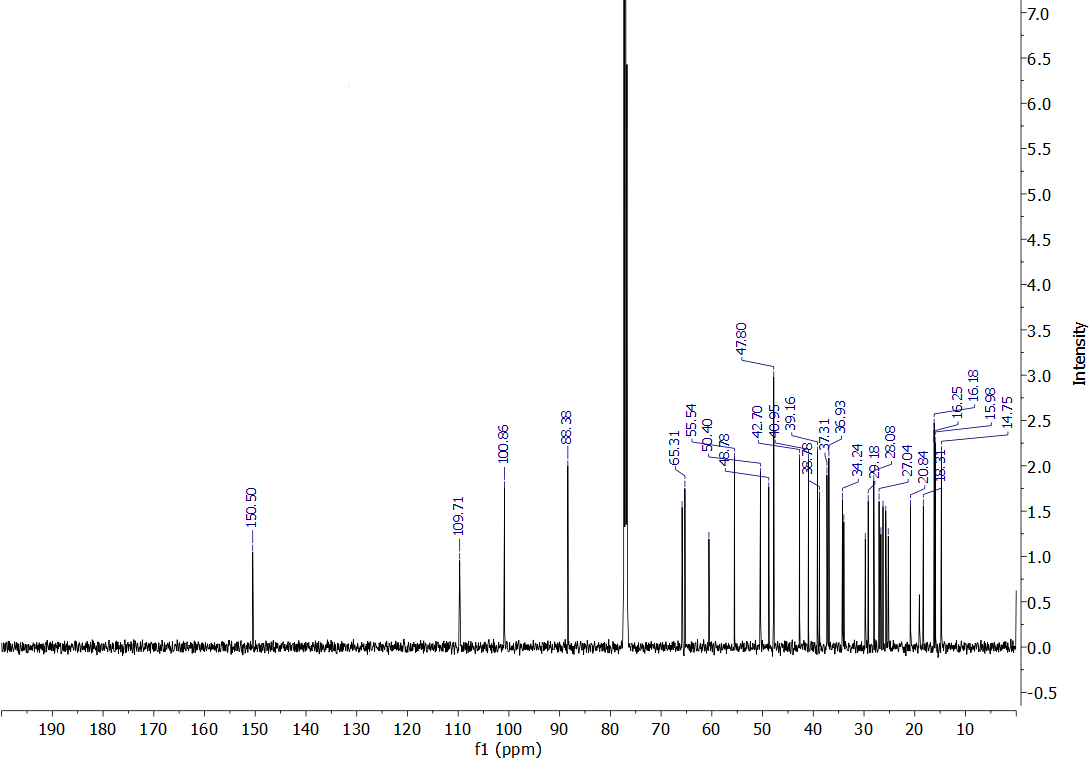
**

**Figure S13.** 1H and 13C NMR spectra of **17β**.

**
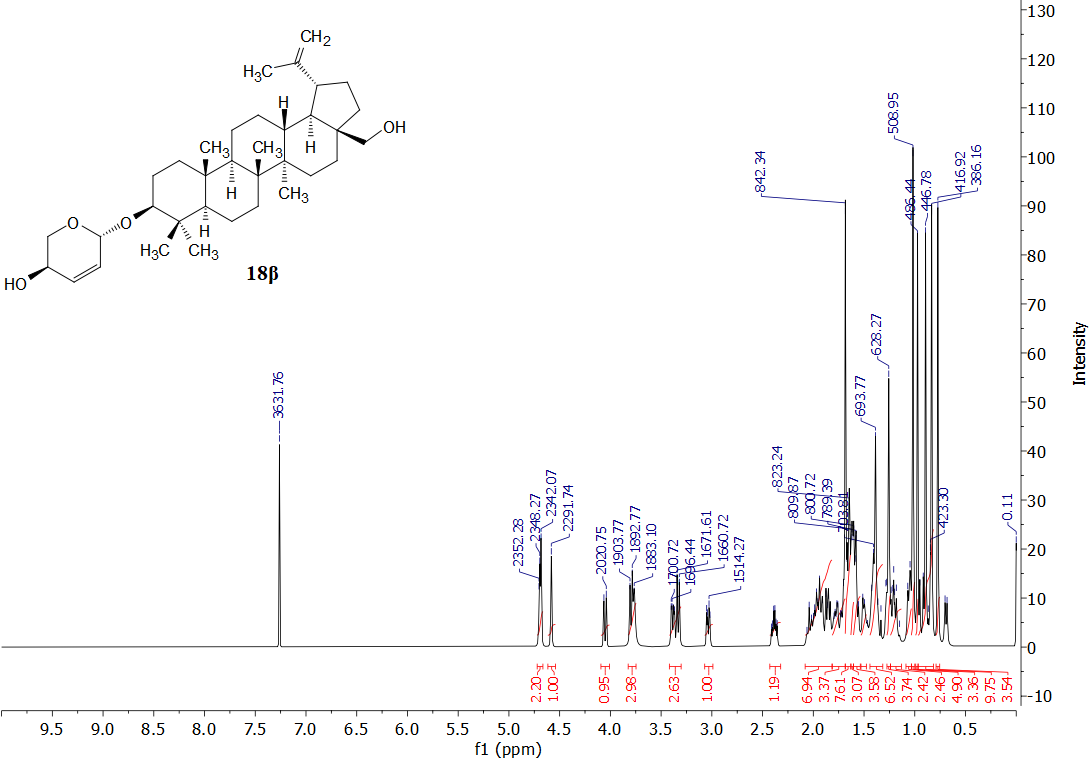
**

**
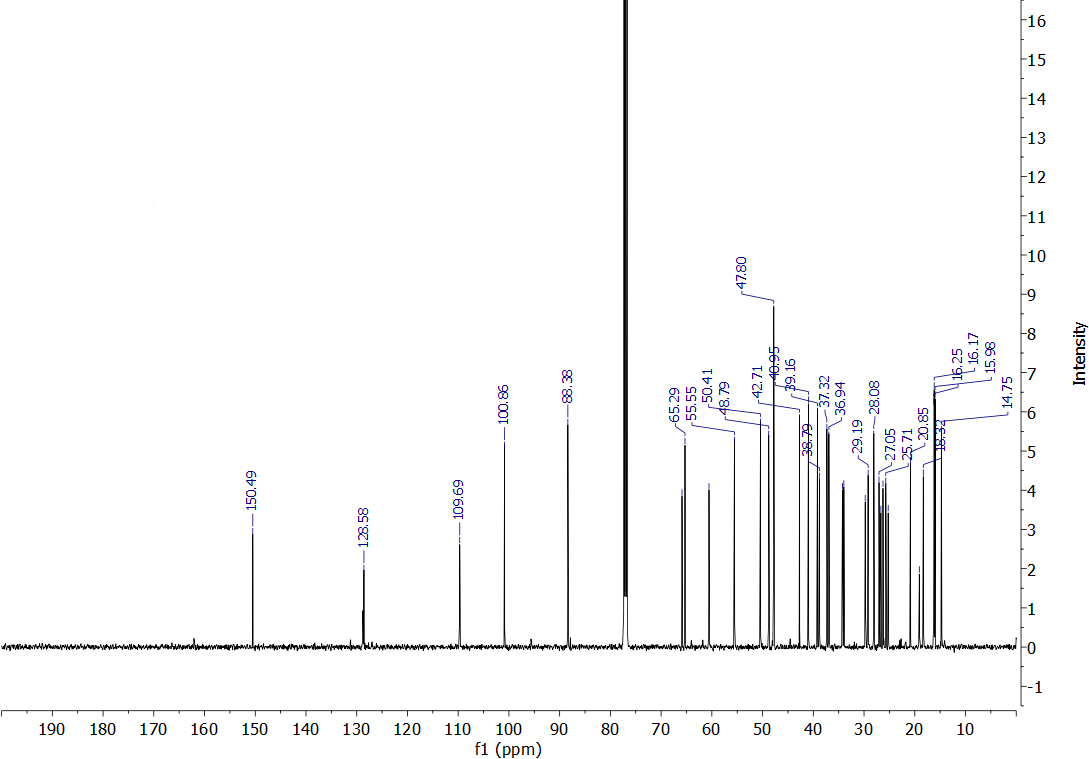
**

**Figure S14.** 1H and 13C NMR spectra of **18β**.
